# Supplementary material for: Use of spectral cloud emissivity to infer ice cloud boundaries:Methodology and assessment using CALIPSO cloud products
Source: Copernicus journal article supplement (doi:10.5194/amt-2019-148), 2019-06-11
Supplement: Supplementary file [file amt-2019-148-AC2-supplement.pdf]

# Use of spectral cloud emissivities and their related uncertainties to infer ice cloud boundaries: Methodology and assessment using CALIPSO cloud products

Hye-Sil Kim<sup>1</sup>, Bryan A. Baum<sup>2</sup>, and Yong-Sang Choi<sup>1</sup>

5 <sup>1</sup>Department of Climate and Energy Systems Engineering, Ewha Womans University, Seoul, Korea

<sup>2</sup>Science and Technology Corporation, Madison, Wisconsin, USA

*Correspondence to:* Yong-Sang Choi (ysc@ewha.ac.kr)

**Abstract.** Satellite imager-based operational cloud property retrievals generally assume that a cloudy pixel can be treated as being plane-parallel with horizontally homogeneous properties. This assumption can lead to high uncertainties in cloud heights, particularly for the case of optically thin, but geometrically thick, clouds composed of ice particles. This study demonstrates that ice cloud emissivity uncertainties can be used to provide a reasonable range of ice cloud layer boundaries, i.e., the minimum to maximum heights. Here ice cloud emissivity uncertainties are obtained for three IR channels centered at 11, 12, and 13.3  $\mu\text{m}$ . The range of cloud emissivities is used to infer a range of ice cloud temperature/heights, rather than a single value per pixel as provided by operational cloud retrievals. Our methodology is tested using MODIS observations over the western North Pacific Ocean during August 2015. We estimate minimum/maximum heights for three cloud regimes, i.e., single-layered optically thin ice clouds, and single-layered optically thick ice clouds, and multi-layered clouds. Our results are assessed through comparison with CALIOP Version 4 cloud products for a total of 11873 pixels. The cloud boundary heights for single-layered optically thin clouds show good agreement with those from CALIOP; biases for maximum (minimum) heights versus the cloud top (base) heights of CALIOP are 0.13 km (−1.01 km). For optically thick and multi-layered clouds, the biases of the estimated cloud heights from the cloud top/base become larger (0.30/−1.71 km, 1.41/−4.64 km). The vertically resolved boundaries for ice clouds can contribute new information for data assimilation efforts for weather prediction and radiation budget studies. Our method is applicable to measurements provided by most geostationary weather satellites including the GK-2A advanced multi-channel infrared imager.

## 1 Introduction

25 Satellite sensors provide data daily that are essential for determining global cloud properties, including cloud height/pressure/temperature, thermodynamic phase (ice or liquid water), cloud optical thickness, and effective particle size. These variables are essential for understanding the net radiation of the earth and the impact of clouds (L'Ecuyer et al. 2019). In particular, cloud heights at the top and base levels are necessary to determine upwelling and downwelling infrared (IR) radiation (Slingo and Slingo, 1988; Baker, 1997; Harrop and Hartmann; 2012). Additionally, cloud heights are used to derive

30 atmospheric motion vectors that are important for most global data-assimilation systems (Bouttier and Kelly, 2001) affecting  
the accuracy of the global model forecast (Lee and Song, 2018). However, in most operational retrievals of cloud properties,  
only a single cloud height is inferred for a given pixel, or field of view. The goal of this study is to develop an algorithm to  
infer cloud height boundaries for semi-transparent ice clouds using only IR measurements for its applicability of global data  
regardless of solar illumination. Where this study could provide the most benefit is for the case where an ice cloud is  
35 geometrically thick but optically thin.

Although our approach will be applied to geostationary satellites in future work, the algorithm is developed for the  
Moderate Resolution Imaging Spectroradiometer (MODIS) sensor for two reasons: (1) our resulting cloud temperatures can  
be compared to those from the Cloud-Aerosol Lidar and Infrared Pathfinder Satellite Observation/Cloud-Aerosol Lidar with  
Orthogonal Polarization (CALIPSO/CALIOP) active lidar Version 4 products for verification and (2) further comparison can  
40 be made to the MODIS Collection 6 cloud products. The approach adopted in our study for the inference of ice cloud height  
has a basis in the work of Inoue (1985), who developed this approach using only the split-window channels on the Advanced  
Very High Resolution Radiometer (AVHRR). The goal of the Inoue (1985) approach was to improve the inference of cloud  
temperatures for semi-transparent ice clouds. Heidinger and Pavolonis (2009) further improved this approach and generated a  
25-year climatology of ice cloud properties from AVHRR analysis.

45 For satellite-based cloud height retrievals based on passive IR measurements, the radiative emission level is regarded as the  
cloud top. When the emissivity is 1, the cloud is emitting as a blackbody and the cloud top is at, or close to, the actual cloud's  
upper boundary. As the emissivity decreases, the cloud top inferred from IR measurements will be lower than the actual cloud  
top level. This is demonstrated in Holz et al. (2006), who compared the cloud tops from aircraft Scanning High-Resolution  
Interferometer Sounder (S-HIS) measurements to those from co-incident measurements from the Cloud Physics Lidar (CPL).  
50 They found that the best match between the cloud tops based on the passive S-HIS measurements and the CPL occurs when  
the integrated cloud optical thickness is approximately 1. This implies that the differences of cloud top heights by IR  
measurements from those by CALIOP are expected since the IR method reports the height where the integrated cloud optical  
thickness, beginning at cloud top and moving downwards into the cloud, is approximately 1 while CALIOP reports the actual  
cloud top to be where the first particles are encountered.

55 With regard to geometric differences of IR cloud tops from the actual cloud tops, optically thin but geometrically thick  
clouds show the largest bias, since the level of which the integrated optical thickness reaches 1 is much lower than the height  
at which the first ice particles occur. In a review of different ten satellite retrieval methods for cloud top heights by IR  
measurements (Hamann et al., 2014), the heights inferred for optically thin clouds are generally below the cloud's mid-level  
height. When lower-level clouds are present below the cirrus in a vertical column, the inferred cloud height can be between  
60 the cloud layers, depending on the optical thickness of the uppermost layer.

There is a retrieval approach to infer optically thin cloud-top pressure that uses multiple IR absorption bands within the 15-  
 $\mu\text{m}$   $\text{CO}_2$  band (e.g., Menzel et al. 2008; Baum et al. 2012), called the  $\text{CO}_2$  slicing method. These 15- $\mu\text{m}$   $\text{CO}_2$  band channels  
are available on the Terra/Aqua MODIS imagers, the HIRS sounders, and with any hyperspectral IR sounder (IASI, CrIS,

AIRS). MODIS is the only imager where multiple 15- $\mu\text{m}$  CO<sub>2</sub> channels are available. Zhang and Menzel (2002) showed  
65 improvement of the retrieval of ice cloud height when they take into account spectral cloud emissivity that has some sensitivity  
to the cloud microphysics. As the goal of our work is to develop a reliable method for inferring ice cloud height from  
geostationary data, we are limiting this study to the use of the relevant IR channels, i.e., measurements at 11- 12-, and 13.3-  
 $\mu\text{m}$ .

To complement the use of IR window channels, the addition of a single IR absorption channel, such as one within the broad  
70 15- $\mu\text{m}$  CO<sub>2</sub> band, has been shown to improve the inference of cirrus cloud temperature (Heidinger et al., 2010). Their study  
shows how adding a single IR absorption channel at 13.3  $\mu\text{m}$  to the IR 11- and 12- $\mu\text{m}$  window channels decreases the solution  
space in an optimal estimation retrieval approach and leads to closer comparisons in cloud height/temperature with  
CALIPSO/CALIOP cloud products.

Rather than inferring a single ice cloud temperature in each pixel, we infer a range of ice cloud temperatures (minimum to  
75 maximum temperature per each ice cloud pixel) that correspond to uncertainties in the cloud spectral emissivity. We note that  
the spectral cloud emissivity, which can be obtained using measurements at 11, 12, and 13.3  $\mu\text{m}$ , has some dependence on the  
ice cloud microphysics. The emissivities are used subsequently to estimate ranges of cloud height, which are found by  
converting the estimated cloud temperature ranges using a simple linear interpolation of the Numerical Weather Prediction  
(NWP) model profiles. Cloud boundary results are presented for three cloud categories, i.e., single-layered optically thin ice  
80 clouds, single-layered optically thick ice clouds, and multi-layered clouds, and these results are assessed with measurements  
from a month of collocated CALIOP Version 4 data. The focus area for the data analysis and resulting analyses is the western  
North Pacific Ocean for the month of August 2015.

The paper is organized as follows. Section 2 describes the data used in this study. Section 3 presents the methodology and  
the generation of the relevant look-up tables (LUTs) for the radiances and brightness temperatures used in our analyses. Section  
85 4 provides results for the western North Pacific Ocean during August 2015, and comparisons with CALIOP. Section 5  
discusses the results and Section 6 summarizes this paper.

## **2 Data**

### **2.1 Study domain**

The study domain is the western North Pacific Ocean (0°N–30°N, 120°E–170°E) during three months of August from 2013–  
90 2015. Two of these months (August 2013 and August 2014) are used for generating the LUTs, while the month of August in  
2015 is used for testing and validating the current algorithm. The reason for restriction of the study domain is to obtain a clear  
relationship between radiances/brightness temperatures and spectral cloud emissivity. In the western North Pacific Ocean, the  
ice clouds can be generated from diverse meteorological conditions including frequent typhoons.

## 2.2 Aqua/Moderate Resolution Imaging Spectroradiometer (MODIS)

95 The MODIS is a 36-channel whisk-broom scanning radiometer on the NASA Earth Observing System Terra and Aqua platforms. The Aqua platform is in a daytime ascending orbit at 1330 LST. The MODIS sensor has four focal planes that cover the spectral range 0.42–14.24  $\mu\text{m}$ . The longwave bands are calibrated with an onboard blackbody. Table 1 shows the Aqua MODIS products used in this study; these products include the Collection 6 1-km Level-1b radiance data (MYD021KM), geolocation data (MYD03), and the cloud properties at 1-km resolution (MYD06). In this study, the radiances and brightness  
100 temperatures at 11, 12, and 13.3  $\mu\text{m}$  (channels 31, 32, and 33, respectively) are taken from the C6 MYD021KM data. Latitude/longitude information for each granule is from C6 MYD03. The C6 MYD06 product provides cloud emissivity values in the IR window (8.5, 11, and 12  $\mu\text{m}$ ) and also cloud top height (CTH), all at 1-km spatial resolution; these parameters were not included in earlier collections (Menzel et al., 2008; Baum et al., 2012). The cloud emissivities at 11 and 12  $\mu\text{m}$  are used in this study.

## 105 2.3 CALIPSO/CALIOP

The CALIPSO satellite platform carries several instruments, among which is a near-nadir-viewing lidar called CALIOP (Winker et al. 2007, 2009). Originally, CALIPSO flew in formation with NASA's Earth Observing System Aqua platform since 2006 and was part of the A-Train suite of sensors. At the time of this writing, it is no longer part of the A-Train but flies in formation with CloudSat in a lower orbit. CALIOP takes data at 532 and 1064 nm. The CALIOP 532-nm channel also  
110 measures the linear polarization state of the lidar returns. The depolarization ratio contains information about aerosol and cloud properties. This study uses CALIPSO Version 4 products that were released in November 2016. With the updated radiometric calibration at 532 and 1064 nm (Getzewich et al., 2018; Vaughan et al., 2019), cloud products such as cloud-aerosol discrimination and extinction coefficients show significant improvement relative to previous versions (Young et al., 2018; Liu et al., 2019). CALIPSO products are used to validate our retrievals, including CAL\_LID\_L2\_VFM-Standard-V4 which  
115 provides cloud vertical features, CAL\_LID\_L2\_05kmCPro-Standard-V4 and CAL\_LID\_L2\_05kmCLay-Standard-V4 which provide cloud top and base temperature (height), extinction coefficients and temperature profiles (Table 1).

## 2.4 Numerical weather model product

The Global Forecast System (GFS) model is produced by the National Centers for Environmental Prediction (NCEP) of the National Oceanic and Atmospheric Administration (NOAA) (Moorthi et al. 2001). GFS provides global NWP model outputs  
120 at 0.5° resolution at 3-hour forecast intervals every 6 hours that are available online (<https://www.ncdc.noaa.gov/data-access/model-data/model-datasets/global-forecast-system-gfs>). We use two variables from the NWP products, temperature profiles and geopotential heights, with cloud heights provided for 26 isobaric layers that are related to cloud temperatures. These data are used for the conversion of cloud temperatures to cloud heights. The NWP fields are remapped to the resolution of satellite imagery by linear interpolation. We use the NWP products that are closest in time to the satellite observations.

## 125 2.5 Clear-sky maps generated from MODIS

The MODIS pixels identified as being clear-sky are used to generate a gridded clear-sky map, which is another ancillary product required for our method. To simplify the generation of this map, the MODIS data with 1km resolution are converted to 5 km resolution. Monthly composites of clear-sky radiances ( $I_{clr}$ ) at  $0.1^\circ \times 0.1^\circ$  resolution are generated by choosing the maximum value among radiances for three months of August (2013–2015) in each  $0.1^\circ \times 0.1^\circ$  grid box. To confirm the availability of the generated  $I_{clr}$ , we present the spatial distribution of  $I_{clr}$  at  $11 \mu\text{m}$  ( $I_{clr|11}$ , Fig. 1(a)), from 8 to  $11 \text{ W m}^{-2} \mu\text{m}^{-1} \text{ sr}^{-1}$ . The largest  $I_{clr|11}$  values are shown over the northwestern region of the domain, whereas the smallest  $I_{clr|11}$  values are shown over the southeastern region of the domain. The pattern of  $I_{clr|11}$  is similar to the spatial distribution of the monthly average of sea surface temperature in 2015 (<https://bobtisdale.wordpress.com/2015/09/08/august-2015-sea-surface-temperature-sst-anomaly-update/>). Also, we show the spatial distribution of differences of  $I_{clr|11}$  from  $I_{clr|12}$  in Fig. 1(a), examining the reliability of the generated  $I_{clr|12}$ . Note that the differences of  $I_{clr|11}$  and  $I_{clr|12}$  are positive over the domain, because water vapor absorption is stronger at  $12 \mu\text{m}$  than at  $11 \mu\text{m}$ . Large differences are shown in the western region, near the Philippines (green-colored contours in Fig. 1).

## 3 Methodology

### 3.1 Cloud retrieval algorithm

140 The basis for the retrieval algorithm is provided in Inoue (1985). Figure 2(a) shows the plane parallel homogeneous cloud model with no scattering. The ice cloud layer at a given height has a corresponding ice cloud temperature ( $T_c$ ) and an associated cloud emissivity ( $e_c$ ). The observed upwelling radiance ( $I_{obs}$ ) at the cloud top is composed of two terms: the first depending on the upwelling clear-sky radiance ( $I_{clr}$ ) at the cloud base and the other depending on the radiance ( $B(T_c)$ ) computed for a cloud emitting as a blackbody:

$$145 \quad I_{obs} = (1 - e_c)I_{clr} + e_c B(T_c), \quad (1)$$

where  $B(T_c)$  is the Planck emission for a cloud computed at  $T_c$  (Liou, 2002). All terms in Eq. (1) are wavelength dependent except for the  $T_c$ .  $I_{obs}$  is determined from the satellite measurements, and  $I_{clr}$  can be found from clear-sky conditions in the imagery or computed by a radiative transfer model given a set of atmospheric profiles of temperature, humidity, and trace gases. However,  $e_c$  and  $T_c$  are unknown.

150 Eq. (1) can be rearranged to solve for the emissivity:

$$e_c = (I_{obs} - I_{clr}) / (B(T_c) - I_{clr}). \quad (2)$$

One can relate two channels by taking a ratio of the radiances, similar to that of the  $\text{CO}_2$  slicing method (e.g., Menzel et al. 2008) and assuming that the emissivity between two channels spaced closely in wavelength are the same. However, Zhang

and Menzel (2002) showed improvement of the retrieval of ice cloud pressure by accounting for differences in the spectral  
155 cloud emissivity.

Inoue (1985) discusses the range of uncertainties in both  $T_c$  and  $e_c$  and further suggests that use of multiple IR channels can reduce the uncertainties. To relate the effective emissivity between two channels, Inoue uses the relation of the cirrus emissivity to the optical thickness. The  $e_c$  is a function of the absorption coefficient ( $\kappa$ ) and the cloud thickness ( $z$ ),

$$e_c = 1 - \exp^{-\kappa z / \mu} . \quad (3)$$

160 The term  $\mu$  in Eq. (3) is a cosine of the viewing zenith angle; the quantity  $\kappa z$  is called the optical thickness and is also wavelength dependent. Given a value for  $e_c$ , the  $T_c$  can be obtained by Eq. (2). The estimate of  $e_c$  from an IR measurement will have inherent uncertainties due to the diversity of ice particle size distributions (i.e., cloud microphysics), sensor calibration, and in the cloud vertical inhomogeneity.

Another way to constrain these uncertainties is by using multiple IR channel measurements, specifically the spectral  
165 emissivity differences between two IR window channels ( $\Delta e_c$ ). We can express the  $\Delta e_c$  between two IR channels by:

$$\Delta e_c = \exp^{-\frac{\kappa' z}{\mu}} - \exp^{-\frac{\kappa z}{\mu}} . \quad (4)$$

In Eq. (4),  $\kappa'$  is the absorption coefficient at 'another' IR window channel. That is, the  $\Delta e_c$  is determined by  $(\kappa - \kappa')/z$  which depends on the cloud particle size and cloud thickness (Kikuchi et al., 2006). Many studies have adopted this, or a similar, approach to apply the representative relations of spectral cloud emissivity relying on cloud types to retrieve the  $T_c$  (e.g., Inoue,  
170 1985; Parol et al., 1991; Giraud et al, 1997; Cooper et al, 2003; Heidinger and Pavolonis, 2009).

For the case of two IR channels, Inoue (1985) formulated the retrieval of the cirrus cloud temperature and effective emissivity by setting up three equations with three unknowns (specifically referring to Inoue's equations 5, 6, and 7): Two equations are same as Eq. (2) at 11 and 12  $\mu\text{m}$  in this paper, and the last equation is as follows.

$$e_c|_{12} = 1 - (1 - e_c|_{11})^{1.08}, \quad (5)$$

175 where  $e_c|_{11}$  and  $e_c|_{12}$  represent cloud emissivity for 11 and 12  $\mu\text{m}$ , respectively. In Inoue (1985), the extinction coefficient ratio between the 11- and 12- $\mu\text{m}$  channels is set to a constant value of 1.08. The cloud temperature is determined by assuming a cloud emissivity at one wavelength, calculating the emissivity at the other wavelength, and modifying the emissivities until a consistent cloud temperature is found for both wavelengths. The initial assumed 11- $\mu\text{m}$  cloud emissivity begins with a value of 0 and increases by a value of 0.01 until  $T_c$  converges.

180 Inoue's (1985) approach for developing the spectral cloud emissivity relationship improved the accuracy of the cirrus temperature retrievals. More recent studies explored the extinction coefficient ratio between the 11 and 12- $\mu\text{m}$  channels for various cloud types (Parol et al., 1991; Duda and Spinhirne, 1996; Cooper et al., 2003). Heidinger et al. (2009) uses an optimal

estimation method that employs extinction coefficient ratios using pairs of the 8.6, 11, 12, and 13- $\mu\text{m}$  channels to infer cloud heights for GOES-16/17.

185 In this study, we apply a range of spectral cloud emissivity values to infer cloud temperatures rather than an optimum value. In our approach, the cloud is considered as a number of plane parallel homogeneous cloud layers. The cloud layer temperature ranges,  $\mathbf{T}_c$ , are estimated as a vector of possible  $T_c$  values given a range of the  $e_c$  and  $\Delta e_c$  (hereafter,  $\mathbf{e}_c$  and  $\Delta \mathbf{e}_c$ ) such as  $\mathbf{e}_c = [e_c^1, e_c^2, \dots, e_c^n]$  and  $\Delta \mathbf{e}_c = [\Delta e_c^1, \Delta e_c^2, \dots, \Delta e_c^n]$  as shown in Fig. 2(b). The  $\mathbf{e}_c$  and  $\Delta \mathbf{e}_c$  in Fig. 2(b) describes a range of possible spectral cloud emissivity values that can simulate the measured channel radiances. Thus, this study aims to produce  $\mathbf{T}_c$  given  
190 the  $\mathbf{e}_c$  and  $\Delta \mathbf{e}_c$ , and to examine how closely the retrieved  $\mathbf{T}_c$  are to the actual vertical cloud structure.

The differences between this study and Inoue (1985) are summarized as follows.

1. Constraints in the iteration range for cloud emissivity are provided in look-up tables (LUTs) discussed in the next section, as opposed to considering the full range of possible values from 0 to 1.
2. Emissivity differences ( $\Delta \mathbf{e}_c$ ) are used, rather than a single value for the extinction coefficient ratio between two infrared  
195 channels.
3. Given the range of emissivity differences ( $\Delta \mathbf{e}_c$  provided in LUTs), we obtain a range of  $\mathbf{T}_c$  (and hence a range of cloud heights,  $\mathbf{H}_c$ ) that can be compared to CALIPSO products.

The first step in the current method (Fig. 3) is to constrain 11- $\mu\text{m}$  cloud emissivity ranges ( $\mathbf{e}_c|_{11}$ ) that an ice cloud pixel can have based on the brightness temperatures. To obtain a reasonable  $\mathbf{e}_c|_{11}$  boundary corresponding to the ice cloud microphysical  
200 properties, the LUTs are generated to provide  $\mathbf{e}_c|_{11}$  ranges characterized by brightness temperature (BT) for 11  $\mu\text{m}$  ( $\text{BT}|_{11}$ ), BT differences (or BTD) between 11 and 13  $\mu\text{m}$  ( $\text{BTD}|_{11,13}$ ) and between 11 and 12  $\mu\text{m}$  ( $\text{BTD}|_{11,12}$ ) (the light gray box in Fig. 3).

The second step is to constrain cloud emissivity differences between 11 and 12  $\mu\text{m}$  for an ice cloud pixel,  $\Delta \mathbf{e}_c|_{11,12}$  that are also provided in LUTs (the dark gray box in Fig. 3) with identical input parameters as in the first step. The third step is to find  $\mathbf{T}_c$  values satisfying the three equations, i.e., Eq. (2) at 11  $\mu\text{m}$ , Eq. (2) at 12  $\mu\text{m}$ , and the equation for cloud emissivity  
205 differences (Eq. (4)) between 11 and 12  $\mu\text{m}$  with constraints in  $\mathbf{e}_c|_{11}$  and  $\Delta \mathbf{e}_c|_{11,12}$ . That is, the last equation among the three equations in our method is different from Inoue's method (Eq. (5)) where

$$e_c|_{11} = e_c|_{12} + \Delta e_c|_{11,12}. \quad (6)$$

The initial assumed 11- $\mu\text{m}$  cloud emissivity begins with a value of  $\min(\mathbf{e}_c|_{11})$  and increases by a value of 0.01 until  $T_c$  converges. Notice that the  $T_c$  value, an element of available ice cloud temperatures set as  $\mathbf{T}_c$ , depends on  $\Delta \mathbf{e}_c|_{11,12}$  in Eq. (4). That is, we  
210 obtain two  $T_c$  values as the minimum and maximum temperatures that an ice cloud pixel can have, corresponding to  $\min/\max(\Delta \mathbf{e}_c|_{11,12})$ . Finally, we estimate cloud height ranges,  $\mathbf{H}_c$ , relating to  $\min/\max(\mathbf{T}_c)$  using a dynamical lapse rate calculated from GFS NWP temperature profiles provided for 26 isobar layers. The dynamical lapse rate on each grid is calculated from differences in temperatures between 200 and 400 hPa per differences in heights between 200 and 400 hPa. In this study, no cloud heights are not allowed to be higher than tropopause, which is provided in the GFS NWP model product.

### 215 3.2 Generation of look-up tables (LUTs)

For our method, relevant information for the western North Pacific Ocean is stored in look-up tables (LUTs). The LUTs include the min/max( $\epsilon_c$ ) and min/max( $\Delta\epsilon_c$ ) values for three indices:  $BTD|_{11,13}$ ,  $BTD|_{11,12}$ , and  $BT|_{11}$ . The reason for selecting these three indices is that they are linked with cloud optical thickness, cloud effective radius, and cloud temperatures, respectively. Both solar and infrared radiances have been used to investigate cloud microphysics using passive satellite measurements (e.g., Freud et al., 2008; Lensky and Rosenfeld, 2006; Martins et al., 2011). A primary benefit of using IR measurements is that the ice cloud temperature and emissivity do not depend on solar illumination, so the cloud properties are consistent between day and night.

First, the  $BTD|_{11,13}$  is sensitive to the presence of mid- to high-level clouds and the cloud height. While both the 12- and 13.3- $\mu\text{m}$  measurements are both affected by  $\text{CO}_2$  absorption, the 12- $\mu\text{m}$  channel is at the wing of the broad 15- $\mu\text{m}$   $\text{CO}_2$  band and has less  $\text{CO}_2$  absorption than the 13.3- $\mu\text{m}$  channel. Additionally, the peak of weighting function for the 13.3- $\mu\text{m}$  channel is in the vicinity of 700-800 hPa so that the observed radiance at 13.3  $\mu\text{m}$  represents the lower tropospheric temperature. Thus, the BT at 13.3  $\mu\text{m}$  is generally colder than that of the two other IR window channels. The  $BTD|_{11,13}$  is larger for clear-sky pixels than for ice clouds, but  $BTD|_{11,13}$  depends on degree of cloud opacity. The  $BTD|_{11,13}$  has been applied by Mecikalski and Bedka (2006) to monitor changes in cloud thickness and height for signals of convective initiation.

Second, the  $BTD|_{11,12}$  depends in part on the microphysics and cloud opacity, i.e., the number and distribution of the ice particles; the imaginary part of the refractive index for ice varies in the IR region under study. The  $BTD|_{11,12}$  has been used to identify cloud type (Inoue, 1985; Pavolonis and Heidinger, 2004; Pavolonis et al., 2005). Prata (1989) used the  $BTD|_{11,12}$  to discern volcanic ash from non-volcanic absorbing aerosols. Recently, adding BT from 8.6 and 11  $\mu\text{m}$ , the  $BTD|_{11,12}$  is also applied to infer cloud phase (Strabala et al., 1994; Baum et al., 2000, 2012).

Finally,  $BT|_{11}$  values can provide cloud height information, at least for optically thick clouds including low-level clouds. For optically thick clouds, the  $BT|_{11}$  values approximate the actual cloud temperature, since at 11  $\mu\text{m}$  the primary absorber is water vapor and there is generally little absorption above high-level ice clouds. As noted earlier, the  $BT|_{11}$  for optically thin clouds includes a contribution from upwelling radiances from the surface and lower atmosphere.

The LUTs are compiled for  $\epsilon_c$  and  $\Delta\epsilon_c$  by three input parameters, i.e.,  $BTD|_{11,13}$ ,  $BTD|_{11,12}$ , and  $BT|_{11}$  from information in the C6 MODIS products. Data used in generating our LUTs are summarized in Table 1. The first step is to collect all ice cloud radiances at 11, 12, and 13.3  $\mu\text{m}$  from MYD021KM over the western North Pacific Ocean during the recurring period of the August 2013 and 2014. Ice cloud pixels are identified by the MODIS IR cloud thermodynamic phase product in MYD06 (Baum et al. 2012) and where the pixels have a cloud top temperature  $\leq 260$  K. The spatial and temporal domain is restricted to obtain a clear relationship between spectral cloud emissivity and three IR parameters for the case study analyses that will be presented in Section 4.

The second step is to categorize the ensemble of ice cloud pixels by three parameters,  $BTD|_{11,13}$ ,  $BTD|_{11,12}$ , and  $BT|_{11}$ . The collected cloud pixels are separated into cloud types linked with cloud microphysical properties. We convert radiances centered



at 11, 12, and 13.3  $\mu\text{m}$  to BT by the inverse Planck's function and then calculate  $\text{BTD}|_{11,13}$ ,  $\text{BTD}|_{11,12}$ , and  $\text{BT}|_{11}$  for each pixel. Subsequently the ice cloud pixels are sorted into range bins defined for the three parameters as follows:  $\text{BT}|_{11}$  values in a range from 190 K to 290 K in increment of 5 K;  $\text{BTD}|_{11,13}$  values in a range from  $-2$  K to 30 K in increments of 2 K; and  $\text{BTD}|_{11,12}$  values ranging from  $-1$  K to 10 K in increments of 0.5 K (Table 2). For example, the first category is  $190 \text{ K} \leq \text{BT}|_{11} < 195 \text{ K}$ ,  $-2 \leq \text{BTD}|_{11,13} < 0$ , and  $-1 \leq \text{BTD}|_{11,12} < -0.5$ .

The final step is to find the possible ranges of  $e_c$  and  $\Delta e_c$  in each of the bins of  $\text{BTD}|_{11,13}$ ,  $\text{BTD}|_{11,12}$ , and  $\text{BT}|_{11}$ . Here we use the cloud emissivity values at 11 and 12- $\mu\text{m}$  for each ice cloud pixel provided in MYD06, for which the Scientific Data Set (SDS) names are 'cloud\_emiss11\_1km' and 'cloud\_emiss12\_1km'. The cloud emissivity for a single band is obtained by the following equation:

$$e_c = (I_{obs} - I_{ctr}) / (I_{ac} + T_{ac}B(T_c) - I_{ctr}). \quad (7)$$

In Eq. (7),  $T_{ac}$  and  $I_{ac}$  are the above-cloud transmittance and the above-cloud emission (Baum et al., 2012), which are additional terms compared to the definition of the cloud emissivity in the infrared window regions in this paper (Eq. (2)). In spite of different definition of Eq. (7) from the Eq. (2), we use this cloud emissivity data since there the differences are small from the two different equations in the infrared window region. Note that the cloud emissivity data from C6 MYD06 are retrieved under the assumption of the single-layered cloud. Here the possible ranges of  $e_c$  and  $\Delta e_c$  are determined as the min/max( $e_c$ ) and ( $\Delta e_c$ ) among cloud emissivity values allocated by the bins of three parameters. To exclude extreme values, the min/max( $e_c$ ) and ( $\Delta e_c$ ) are defined as the 2<sup>nd</sup> /98<sup>th</sup> percentiles of the  $e_c$  and  $\Delta e_c$  distributions when there are at least 5,000 pixels available for a given bin. When there are between 500 and 5000 pixels, the 5<sup>th</sup> /95<sup>th</sup> percentiles are chosen as the min/max( $e_c$ ) and ( $\Delta e_c$ ). In the rare case when there are between only 200 and 500 pixels, the 10<sup>th</sup> /90<sup>th</sup> percentiles are used. Any case with fewer than 200 ice cloud pixels is not included in the LUTs.

Fig. 4 shows examples of LUT values for  $e_c$  belonging to the specific category for  $230 \text{ K} \leq \text{BT}|_{11} < 235 \text{ K}$  (Fig. 4(a)) and  $270 \text{ K} \leq \text{BT}|_{11} < 275 \text{ K}$  (Fig. 4(b)), which imply the presence of optically thick and thin ice clouds, respectively. The minimum (the left panel) and maximum (the right panel) values of the  $e_c$  are shown as colors in the space of  $\text{BTD}|_{11,12}$  (x-axis) and the  $\text{BTD}|_{11,13}$  (y-axis). In Fig. 4(a), the  $e_c$  values range from about 0.8 to 1.1. The  $e_c$  generally ranges from 0 to 1, but a non-physical  $e_c$  value over 1 might occur in case of an over-shooting cloud (from strong convection that briefly enters the lower stratosphere) that has colder temperature than surrounding environment temperature (Negri, 1981; Adler et al., 1983). As for optically thin clouds, the  $e_c$  values of Fig. 4(b) range from around 0.3 to 0.8. In general,  $e_c$  values are low when cloudy pixels have large values of  $\text{BTD}|_{11,12}$  and  $\text{BTD}|_{11,13}$ .

Fig. 5 shows examples of LUT values of  $\Delta e_c$  for optically thick (Fig. 5(a)) and thin (Fig. 5(b)) ice clouds as shown in Fig. 4. The  $\Delta e_c$  ranges from  $-0.12$  to  $0.04$ . The  $\Delta e_c$  shows a more complex relationship with  $\text{BTD}|_{11,12}$  and  $\text{BTD}|_{11,13}$  than with  $e_c$ . It is notable that similar patterns  $\Delta e_c$  are repeated on the optically thick (Fig. 5(a)) and thin ice cloud (Fig. 5(b)). One reason for this could be that  $\Delta e_c$  are more sensitive to particles sizes, whereas  $e_c$  values are more directly linked with cloud opacity (refer to Eq. (3) and Eq. (4)). The optically thin ice cloud cluster tends to be more sensitive to  $\text{BTD}|_{11,12}$ , showing larger variations of  $\Delta e_c$  than the thick ice cloud cluster.

## 4 Results

The current algorithm analyses are performed over the study domain, the western North Pacific Ocean, in August 2015. Note that the typhoon ‘Goni’ formed on 13 August and dissipated on 30 August, 2015, and affected East Asia. Case studies involving  
285 Typhoon Goni scenes are provided in Section 4.1. Quantitative analysis and comparison of our results with CALIOP cloud products are described in the Section 4.2.

### 4.1 Comparison of min/max( $H_c$ ) with CALIPSO for three granules

#### 4.1.1 A scene for single-layered optically thin ice clouds (19 August, 2015, at 0320 UTC)

Figure 6 is a scene analysis for single-layered optically thin ice clouds for a granule at 0320 UTC on 19 August, 2015. Fig.  
290 6(a) is a MODIS false color image that captures Tropical Cyclone Goni. Note that the image is rotated 90 degrees left to simplify comparison with CALIPSO. The heavy pink line (Fig. 6(a)) is the south-to-north CALIPSO track at the closest time to the MODIS observation time. The CALIPSO made a near-eye overpass of the cyclone. The CALIOP track measures a cross section of the cyclone, from the eyewall to the outer bands. Fig. 6(b) is a cross section from CALIOP data (Table 3) at the time of the overpass, that shows the horizontal (x-axis) and vertical (y-axis at the left side) locations of all cloud layers. The CALIOP  
295 vertical feature mask (VFM) indicates the presence of randomly-oriented ice and horizontally-oriented ice (sky-blue) in the scene. The y-axis at the right side is for two supplementary data shown as gray lines. The gray solid line is the CALIOP COT at 532 nm, for the opacity of ice clouds. The gray dashed line is the standard deviation of the MODIS  $I_{\text{obs}|11}$  ( $\text{STD}(I_{\text{obs}|11})$ ) on the collocated path with the CALIOP track, calculated over a  $5 \times 5$  pixel array centered at each cloud pixel. The  $\text{STD}(I_{\text{obs}|11})$   
300 includes cloud feature information (Nair et al., 1998). For example, pixels at cloud edges or fractional clouds have relatively large  $\text{STD}(I_{\text{obs}|11})$ . The  $\text{STD}(I_{\text{obs}|11})$  values are used to filter overcast cloud pixels. The data in Fig. 6 are primarily of single-layered ice clouds with horizontal homogeneity as demonstrated by the low value of  $\text{STD}(I_{\text{obs}|11})$ .

For comparison with CALIPSO, the min/max( $T_c$ ) are converted to max/min( $H_c$ ) and are shown from our method (blue/green circles) to the VFM in Fig. 6(b). Also provided is the MODIS CTH (black circles) for reference. For these comparisons, we converted temperature to height using a dynamical lapse rate from GFS NWP temperature profiles. When the cloud pixel  
305 temperature is colder than the tropopause temperature, it is changed to be that of the tropopause and is converted to the tropopause height provided by GFS NWP. The solid red line indicates where the CALIOP COT is about 0.5. This line is a reference for the position where the passive remote sensing retrievals will place the cloud (Holz et al. 2006; Wang et al., 2014), well known as the radiative emission level. The radiative emission level should be thought of more as a guideline since the matched COT values can be different depending on cloud types or algorithm methods. To determine this depth in the cloud  
310 layer, we integrated the extinction coefficient, CALIOP  $Q_e$  (Table 3), from the top of the cloud downwards until the COT reached about 0.5. Hereafter, we call that layer as the effective emission layer, EEL. The enhancement of EEL at approximately  $15.6^\circ\text{N}$  in Fig. 6(b) is caused by an extraordinary value of  $Q_e$  provided in the CALIOP V4.

Note that the  $\max(\mathbf{H}_c)$  (blue circles) is close to the top of clouds except in the region of cloud edges and the eye of Goni. Bias between the cloud top and the  $\max(\mathbf{H}_c)$  is 0.46 km, that is  $-4.5$  K in the aspect of temperature. It is remarkable that the  $\max(\mathbf{H}_c)$  corresponding to uncertainties of cloud emissivity tends to occur at or slightly above the cloud top as indicated by CALIPSO, higher than the EEL and MODIS CTH. The height of the  $\min(\mathbf{H}_c)$  (green circles) also follows the base of the cloud layer with a bias of  $-1.58$  km (10.6 K in temperature), slightly lower than EEL and MODIS CTH. These results show the feasibility of inferring single-layered ice cloud boundaries from spectral cloud emissivity and its uncertainties by IR measurements. The  $\max/\min(\mathbf{H}_c)$  on the cloud edges and the edges of surrounding the eye of the Goni have relatively large biases from the top/base of the cloud. Those regions show relatively large  $\text{STD}(I_{\text{obs}|11})$  and small COT and contain multiple clouds. To sum up, our resulting cloud heights corresponding to cloud emissivity uncertainties are likely to exhibit similar variations to the CALIOP VFM, except the cloud edges and multiple cloud regions.

#### 4.1.2 A scene for single-layered optically thick ice clouds (19 August, 2015, at 1530 UTC)

The second case is the single-layered optically thick ice clouds (Fig. 7) at 1530 UTC on 19 August 2015. Here we show the  $\text{BT}|_{11}$  image instead of RGB image (Fig. 7(a)) since this is a nighttime scene. Fig. 7(a) is also rotated 90 degrees left. For this overpass, CALIOP observed clouds farther away from the center of Goni, and inspection of the cross-section in Fig. 7(b) suggests that most of cloud pixels are optically thick with COT values higher than 5, about where the CALIOP signal attenuates, and have relatively low  $\text{STD}(I_{\text{obs}|11})$  as indicated by the gray solid/dashed line in Fig. 7(b). In the comparison with the CALIOP VFM, the  $\max(\mathbf{H}_c)$  tends to occur at or slightly below the cloud top as indicated by CALIPSO, still higher than the EEL and MODIS CTH. The bias for the  $\max(\mathbf{H}_c)$  from the top of clouds is 2.38 km ( $-13.2$  K), which is larger than that of optically thin ice clouds. The bias for  $\min(\mathbf{H}_c)$  from the cloud base is larger than that of optically thin clouds,  $-2.69$  km (19.4 K), but the  $\min(\mathbf{H}_c)$  still exhibit similar variation to CALIOP VFM. The passive IR measurements have an upper COT limit as shown in earlier studies (Heidinger et al. 2009; 2010). The height boundaries from our method brackets both the CALIPSO measurements and the MODIS retrievals.

#### 4.1.3 A scene for multi-layered cloud (8 August, 2015, at 0520 UTC)

The third case also involves a cross-section of Goni, but this scene is more complex in that there is evidence of both multi-layered and less homogeneous ice clouds on the southern boundary of the typhoon (Fig. 8a). Note that the  $\text{STD}(I_{\text{obs}|11})$  on the CALIPSO track show relatively large variances, compared to the previous two cases (Fig. 8(b)). The CALIOP COT is omitted given the high fluctuations in the values. The CALIOP vertical feature mask (VFM) indicates the presence of randomly-oriented ice and horizontally-oriented ice (sky-blue) including water (orange) cloud phase. The enhancement of EEL at around  $25.7^\circ\text{N}$  in Fig. 8(b) is also caused by an extraordinary value of  $Q_c$  provided in the CALIOP V4 product. In the region of  $10^\circ\text{N}$ – $20^\circ\text{N}$ , the  $\max/\min(\mathbf{H}_c)$  in this region are often outside the boundaries of the VFM. The  $\max(\mathbf{H}_c)$  (blue circles) varied from near the second cloud layer to the top of the first cloud at the tropopause. Some pixels of the  $\min(\mathbf{H}_c)$  (green circles) values are also outside the range of the VFM. There is more than one reason causing these increased variances, including the fact that

345 the uppermost cloud layer is optically thin (over half of all pixels have  $COT < 1.5$ ) and there are indications of lower cloud layers. In the region of  $20^{\circ}N-30^{\circ}N$ , clouds on the top layer are relatively thick (on average,  $COT = 3.5$ ). In that case, heights of the  $\max(H_c)$  on the multi-layer pixels tend to be close to the EEL, which is much lower than the top of clouds. This is to be expected for the case of a geometrically thick but optically thin cloud. Note that the value of the  $\min(H_c)$  on the multi-layered cloud pixels sometimes reach almost to the second cloud layer, rather than near the first layer. Further thought needs to be  
350 given to these cases.

#### 4.2 Comparison of max/min $H_c$ with CALIPSO for August 2015

In this section, the  $\max/\min(H_c)$  is compared with the cloud top/base height (CTH/CBH) from CALIOP over the western North Pacific during August 2015. The computationally efficient method of Nagle et al. (2009) is used to collocate the simultaneous nadir observations (SNO) between two satellites. Following their approach, CALIOP is projected onto MODIS.

355 First, we qualitatively examine the  $\max/\min(H_c)$  with the cloud layer vertical cross-section from CALIOP/MODIS matchup files (Table 3) in Fig. 6-Fig. 8. Second, we quantitatively investigate the  $\max/\min(H_c)$  for all ice clouds against CALIOP CTH/CBH during the month. The extinction coefficients profiles, cloud phase and their quality flags, and the number of cloud layers are extracted from CALIOP and used in this analysis (Table 3).

The matchup data are filtered as follows: only ice cloud phase pixels are chosen that have the highest quality (CALIOP QC for cloud phase = 1), where CALIOP  $COT > 1.5$  and  $STD(I_{obs|11})$  from MODIS  $\leq 1$ , which helps to remove cloud edges and fractional clouds. The relationship is investigated between the  $\max/\min(H_c)$  and CALIOP CTH/CBH for three cloud regimes; (1) single-layered optically thin ice clouds, (2) optically thick ice clouds, and (3) multi-layered clouds where the uppermost layer is optically thin cirrus. The CALIOP/MODIS matchup clouds are separated into single-layered and multi-layered cloud groups using the number of layers found (NLF) from CALIOP (Table 3). The multi-layered cloud group includes two or more  
365 cloud layers, excluding single-layered clouds. Among single-layered cloud pixels, we define optically thin/thick cloud groups as CALIOP  $COT$  which is less/greater than 3.5, referring to the ISCCP cloud classification (Rossow et al., 1985; Rossow and Schifer, 1999).

Fig. 9 shows the joint histogram of the  $\max/\min(H_c)$  (y-axis of left/right panels) as a function of the CALIOP CTH/CBH (x-axis) for single-layered optically thin ice cloud (Fig. 9(a)), single-layered optically thick ice cloud (Fig. 9(b)), and multi-  
370 layered clouds (Fig. 9(c)). Table 4 provides all statistical quantities for Fig. 9 as correlations (corr), differences of the mean value (bias), and root mean square differences (rmsd). Additionally, all statistical quantities in terms of temperature are in the unit of K and are given in the round brackets in Table 4. For single-layered clouds, the majority of  $\max(H_c)$  values are scattered about the one-to-one line. The statistical values are  $corr = 0.61$ ,  $bias = 0.13$  km,  $rmsd = 0.91$  for thin clouds. This implies that maximum value of cloud height ranges corresponding to  $e_c$  and  $\Delta e_c$  are close to the cloud top for single-layered clouds as  
375 determined from CALIOP.

However, the scatter is higher for optically thick clouds, with  $corr = 0.65$ ,  $bias = 0.30$  km,  $rmsd = 1.08$  (Table 4). As for the  $\max(H_c)$  for multi-layered clouds, the majority of scatter points are on the lower right side of the one-to-one line, with  $corr =$

0.25, bias = 1.41 km, and rmsd = 2.64. The lowest correlation and the largest bias for multi-layered clouds are shown, as expected given the assumption of the single-layered clouds in our method.

380 The comparisons of the  $\min(\mathbf{H}_c)$  (y-axis of right panels in Fig. 9) to the CALIOP CBH (x-axis) for all cloud categories show relatively large correlations, at least over 0.48. Scatter points in three joint histograms for all cloud types are parallel to the one-to-one line, but show negative biases implying higher heights than CALIOP CBT. As with the cases of the  $\max(\mathbf{H}_c)$ , bias of the  $\min(\mathbf{H}_c)$  increases from single-layered optically thin ice (-1.01 km), to optically thick ice (-1.71 km) and multi-layered clouds (-4.64km).

## 385 5 Discussion of Results

The results in Figs. 6–9 show the comparisons of the ice cloud height ranges obtained based on the ice cloud emissivity uncertainties with both MODIS C6 products and vertical cross sections of clouds from CALIOP. We investigated minimum and maximum ice cloud heights for each cloud pixel for three cloud regimes during August 2015: (1) single-layered optically thin clouds, (2) optically thick ice clouds, and (3) multi-layered clouds.

390 Overall, the maximum values of the estimated ice cloud height ranges for single-layered optically thin/thick ice clouds show some skill in comparison with the cloud tops from CALIOP: corr = 0.61/0.65, bias = 0.13/0.30 km. In particular, we note that the upper height boundary for optically thin clouds derived from our method are very close to the geometric cloud tops. For multi-layered clouds, the maximum heights are occasionally much lower than the uppermost cloud layer as observed by CALIOP, showing the highest bias at 1.41 km. Higher biases are expected in our method given the assumption of single-  
395 layered clouds in each pixel. Additionally, the skill of our method decreases when the upper cloud layer is composed of optically thin (having very low COT values) and fractional clouds; in some cases, the method cannot determine an emissivity range from the LUTs, which were generated for single-layered ice clouds.

The minimum heights for single-layered optically thin ice clouds reach near the base of cloud, with corr = 0.83, bias = -1.01 km. However, those for thick/multilayer, the biases became larger, at most -4.64 km. That is, the minimum heights for  
400 thick clouds became much higher than the CALIOP, the observed cloud bases. This indicates that the IR method has an optical thickness limitation and is more useful for lower optical thicknesses, which has been noted previously (e.g., Heidinger et al. 2010). Even with large biases of minimum heights, it is notable that correlation coefficients between minimum heights and the cloud base for all three cloud regimes are sufficiently large, at least 0.48.

To better understand the potential biases of the current algorithm in comparison with CALIOP, we compare the  $\text{mean}(\mathbf{H}_c)$   
405 to the  $\text{mean}(\text{CALIOP } \mathbf{H}_c)$  that are defined as  $0.5 \cdot (\max(\mathbf{H}_c) + \min(\mathbf{H}_c))$  and as  $0.5 \cdot (\text{CALIOP CTH} + \text{CALIOP CBH})$ , respectively. Fig. 10 shows the frequency of occurrence of biases, that is, the  $\text{mean}(\text{CALIOP } \mathbf{H}_c)$  minus the  $\text{mean}(\mathbf{H}_c)$ , as a function of CALIOP COT for the single-layered ice clouds during August 2015. In a comparison of the MODIS cloud mask with CALIOP, Ackerman et al., (2008) noted that the cloud mask performs best at optical thicknesses above about 0.4. The lidar has a greater sensitivity to particles in a column than passive radiance measurements. Based on this consideration, we limited our results to  
410 those pixels where the  $\text{COT} \geq 0.5$  in x-axis of Fig. 10.

Fig.10 illustrates that our resulting single-layered ice clouds boundaries are consistent with CALIOP measurements, showing slightly negative biases except the region near 'COT $\leq$ 1.5'. These results suggest that our approach for applying a range of cloud emissivity values to estimate cloud boundaries has potential merit for using IR channels to produce cloud boundaries similar to those that the lidar observes, especially for optically thin but geometrically thick ice clouds which tend to have large uncertainties (Hamann et al., 2014).  
415

The negative biases of the mean( $H_c$ ) from CALIOP measurements are caused primarily by two factors: (1) The min( $H_c$ ) values for all cloud regimes tend to be higher than geometric cloud base, and (2) The max( $H_c$ ) values are sometimes slightly outside the actual cloud boundaries. Perhaps this is caused in part by the conversion of temperature to height using the NWP model product. Another source of error could be that the radiances have some amount of uncertainty that was not considered in our methodology. The notable point is that the boundary heights for optically thin cirrus (1.5<COT $\leq$ 3.5) show the lowest biases.  
420

Fig.10 also addresses the weaknesses of our method. In the region of COT $\leq$ 1.5, biases of mean( $H_c$ ) from CALIOP are largest and positive. This region might be relevant to fractional clouds or cloud edges. We infer that relationship of cloud emissivity at 11 and 12  $\mu$ m, the key controller in our method, might not be optimal in the fractional clouds or cloud edges, resulting in lower heights.  
425

A limitation of this study is that the LUTs are generated for spectral emissivity using IR sensor observations and level-2 products that still have errors and uncertainties. It would be interesting to extend this preliminary research by generating LUTs for spectral emissivity using CALIOP, not IR sensors. If we can obtain more diverse ice cloud emissivity in vertical cloud thickness, it could result in improvements in the resulting cloud temperatures/height ranges. Also, the LUTs based on CALIOP data/products could be used to reduce errors in inferring cloud temperatures for multi-layered clouds.  
430

## 6 Summary

The intent of our study is to demonstrate that ice cloud emissivity uncertainties, obtained from three IR channels generally available on various satellite-based sensors, can be used to estimate a reasonable range of ice cloud temperatures as verified through comparison with active measurements from CALIPSO. For satellite-based retrievals with heavy data volumes, the general assumption is that the cloud in any given pixel can be treated as plane parallel, which simplifies the retrieval algorithms. However, for ice clouds and particularly optically thin ice clouds known as cirrus, the plane-parallel assumption breaks down because cirrus tends to be optically thin but geometrically thick, which is different with lower-level liquid water clouds. For cirrus, the inference of a cloud-top temperature for a given measurement may not be optimal. In our approach, a range of spectral ice cloud emissivity is calculated from which is, in turn, used to infer a range of cloud temperatures. These temperatures are converted to heights and subsequently compared to active lidar measurements provided by CALIPSO/CALIOP products.  
435  
440

This study provides a methodology to infer a range of spectral cloud emissivity for each cloud pixel. The range in emissivity represents uncertainty in the cloud microphysics to some degree. In our approach, we generate two LUTs for cloud emissivity

at 11  $\mu\text{m}$  and cloud emissivity differences between 11 and 12  $\mu\text{m}$  using the brightness temperatures at 11, 12, and 13.3  $\mu\text{m}$ .  
445 The 11- $\mu\text{m}$  channel is a window channel where the primary absorption is caused by water vapor. The 12- $\mu\text{m}$  channel is  
impacted by both  $\text{H}_2\text{O}$  or and  $\text{CO}_2$ , while the 13.3- $\mu\text{m}$  channel has more absorption by  $\text{CO}_2$  than by water vapor. The benefit  
of a method that relies of IR channels is that it does not depend on solar illumination, so the cloud heights can be obtained  
consistently between day and night.

We estimate a range of ice cloud temperature corresponding to the ice cloud uncertainty generated by three IR channels  
450 centered at 11, 12, and 13.3  $\mu\text{m}$  by MODIS C6. The focus area is the western North Pacific Ocean during August 2015. We  
verified the estimated ranges of ice cloud temperature for three cloud categories, i.e., single-layered optically thin ice and  
optically thick ice clouds, and multi-layered clouds, against the vertical feature mask for CALIOP. We show that the  
minimum/maximum values for the estimated range of ice cloud heights agree with CALIPSO measurements fairly well for  
single-layered optically thin clouds. However, for optically thick and multi-layered clouds, the biases of the  
455 minimum/maximum values for those ranges from the cloud top/base became larger.

This approach can be applied to the new geostationary satellites, such as Himawari-8 (launched in 2015), GOES-16/17  
(launched in 2016 and 2017), and GK-2A (launched in 2018). The new features of ice cloud temperatures from base to top by  
geostationary IR observation could contribute to improved accuracy of weather prediction and cloud radiative effects.

In future work, we intend to improve upon this methodology by developing lookup tables for spectral cloud emissivity  
460 uncertainty with CALIOP. Above all, it is required to study for global area for applying this method to the new geostationary  
satellites. Also, further study is required to add more infrared channels to resolve more accurate spectral cloud emissivity  
uncertainties.

*Author contributions.* HSK built, tested, and validated the algorithm, and wrote the manuscript. BB contributed to complete  
the algorithm and to review/edit the manuscript carefully. YSC provided initial idea for the algorithm and guidance of this  
465 study. All authors were actively involved in interpreting results and discussions on the manuscript.

*Competing interests.* The authors declare no conflict of interest.

*Acknowledgments.* This work was supported by the “Development of Cloud/Precipitation Algorithms” project, funded by  
ETRI, which is a subproject of the “Development of Geostationary Meteorological Satellite Ground Segment (NMSC-2019-  
01)” program funded by the National Meteorological Satellite Center (NMSC) of the Korea Meteorological Administration  
470 (KMA).

## References

- Ackerman, S. A., Holz, R. E., Frey, R., Eloranta, E. W., Maddux, B. C., and McGill, M.: Cloud detection with MODIS. Part II: Validation, *J. Atmos. Oceanic Technol.*, 25, 1073–1086, 2008.
- 475 Adler, R. F., Markus, M. J., Fen, D. D., Szejwach, G., and Shenk, W. E.: Thunderstorm top structure observed by aircraft overflights with an infrared radiometer, *J. Appl. Meteorol. Clim.*, 22, 579–593, 1983.
- Baker, M. B.: Cloud microphysics and climate. *Science*, 276, 1072–1078, 1997.
- Baum, B. A., Soulen, P. F., Strabala, K. I., King, M. D., Ackerman, S. A., Menzel, W. P., and Yang, P.: Remote sensing of cloud properties using MODIS airborne simulator imagery during SUCCESS: 2. Cloud thermodynamic phase, *J. Geophys. Res.*, 105, 11781–11792, 2000.
- 480 Baum, B. A., Menzel, P., Frey, R. A., Tobin, D., Holz, R. E., Ackerman, S., Heidinger, A., and Yang, P.: MODIS Cloud-Top Property Refinements for Collection 6, *J. Appl. Meteorol. Clim.*, 51, 1145–1163, 2012.
- Bouttier, F. and Kelly, G.: Observing-system experiments in the ECMWF 4D-Var assimilation system. *Q. J. of the Royal Meteorol. Society*, 127, 1469–1488, 2001.
- 485 Cooper, S. J., L'Ecuyer, T. S., and Stephens, G. L.: The impact of explicit cloud boundary information on ice cloud microphysical property retrievals from infrared radiances, *J. Geophys. Res.*, 108, 4107, doi:10.1029/2002JD002611, 2003.
- Duda, D. P., and Spinhirne, J. D.: Split-window retrieval of particle size and optical depth in contrails located above horizontally inhomogeneous ice clouds. *Geophys. Res. Lett.*, 23, 3711–3714, 1996.
- Freud, E., Strom, J., Rosenfeld, D., Tunved, P., and Swietlicki, E.: Anthropogenic aerosol effects on convective cloud microphysical properties in southern Sweden, *Tellus*, 60B, 286–297, 2008.
- 490 Getzewich, B. J., Vaughan, M. A., Hunt, W. H., Avery, M. A., Powell, K. A., Tackett, J. L., Winker, D. M., Kar, J., Lee, K.-P., and Toth, T. D.: CALIPSO lidar calibration at 532 nm: version 4 daytime algorithm, *Atmos. Meas. Tech.*, 11, 6309–6326, 2018.
- Giraud, V., Buriez, J. C., Fouquart, Y., Parol, F., and Seze, G.: Large-scale analysis of cirrus clouds from AVHRR data: Assessment of both a microphysical index and the cloud-top temperature, *J. Appl. Meteorol.*, 36, 664–675, 1997.
- 495 Hamann, U., Walther, A., Baum, B., Bennartz, R., Bugliaro, L., Derrien, M., Francis, P. N., Heidinger, A., Joro, S., Kniffka, A., Le Gléau, H., Lockhoff, M., Lutz, H.-J., Meirink, J. F., Minnis, P., Palikonda, R., Roebeling, R., Thoss, A., Platnick, S., Watts, P., and Wind, G.: Remote sensing of cloud top pressure/height from SEVIRI: analysis of ten current retrieval algorithms, *Atmos. Meas. Tech.*, 7, 2839–2867, 2014.
- 500 Harrop, B. E., Hartmann, D. L.: Testing the role of radiation in determining tropical cloud-top temperature, *J. Clim.*, 25, 5731–5747, 2012.
- Heidinger, A. K. and Pavolonis, M. J.: Gazing at cirrus clouds for 25 years through a split window, Part I: Methodology, *J. Appl. Meteorol. Clim.*, 48, 1100–1116, 2009.



- Heidinger, A. K., Pavolonis, M. J., Holz, R. E., Baum, B. A., and Berthier, S.: Using CALIPSO to explore the sensitivity to  
505 cirrus height in the infrared observations from NPOESS/VIIRS and GOES-R/ABI, *J. Geophys. Res.*, 115, D00H20, 2010.
- Holz, R. E., Ackerman, S. A., Antonelli, P., Nagle, F., and Knuteson, R.: An improvement to the High-Spectral-Resolution  
CO<sub>2</sub>-slicing cloud-top altitude retrieval, *J. Atmos. Oceanic Technol.*, 23, 653-670, 2006.
- Inoue, T.: On the temperature and effective emissivity determination of semi-transparent cirrus clouds by bi-spectral  
measurements in the 10 $\mu$ m window region, *J. Meteorol. Soc. Japan*, 63, 88–99, DOI: 10.2151/jmsj1965.63.1\_88, 1985.
- 510 Kikuchi, N., Nakajima, T., Kumagai, H., Kuroiwa, H., Kamei, A., Nakamura, R., and Nakajima, T. Y.: Cloud optical thickness  
and effective particle radius derived from transmitted solar radiation measurements: Comparison with cloud radar  
observations., *J. Geophys. Res.*, 111, D07205, doi:10.1029/2005JD006363, 2006.
- Lee, S., and Song, H.-J.: Impacts of the LEOGEO Atmospheric Motion Vectors on the East Asian weather forecasts, *Q. J. of  
the Royal Meteorol. Society*, 144, 1914–1925, 2018.
- 515 Lensky, I. M., and Rosenfeld, D.: The time-space exchangeability of satellite retrieved relations between cloud top temperature  
and particle effective radius, *Atmos. Chem. Phys.*, 6, 2887–2894, 2006.
- Liou, K.-N.: *An Introduction to Atmospheric Radiation*. Vol. 84, access online via Elsevier, 2002.
- Liu, Z., Kar, J., Zeng, S., Tackett, J., Vaughan, M., Avery, M., Pelon, J., Getzewich, B., Lee, K.-P., Magill, B., Omar, A.,  
Lucker, P., Trepte, C., and Winker, D.: Discriminating between clouds and aerosols in the CALIOP version 4.1 data products,  
520 *Atmos. Meas. Tech.*, 12, 703-734, <https://doi.org/10.5194/amt-12-703-2019>, 2019.
- L’Ecuyer T. S. and Hang Y.: Reassessing the effect of cloud type on Earth’s energy balance in the age of active spaceborne  
observations. Part I: Top-of-atmosphere and surface, *J. Clim.*, <https://doi.org/10.1175/JCLI-D-18-0753.1>. 2019.
- Martins, J. V., Marshak, A., Remer, L. A., Rosenfeld, D., Kaufman, Y. J., Fernandez-Borda, R., Koren, I., Correia, A. L.,  
Zubko, V., and Artaxo, P.: Remote sensing the vertical profile of cloud droplet effective radius, thermodynamic phase, and  
525 temperature, *Atmos. Chem. Phys.*, 11, 9485–9501, 2011.
- Mecikalski, J. R., and Bedka, K. M.: Forecasting convective initiation by monitoring the evolution of moving cumulus in  
daytime GOES imagery, *Mon. Wea. Rev.*, 134, 49–78, 2006.
- Menzel, W. P., Frey, R. A., Zhang, H., Wylie, D. P., Moeller, C. C., Holz, R. E., Maddux, B., Baum, B. A., Strabala, K. I., and  
Gumley, L. E.: MODIS global cloud-top pressure and amount estimation: Algorithm description and results, *J. Appl.  
530 Meteorol. Clim.*, 47, 1175–1198, 2008.
- Moorthi, S., Pan, H. L. and Caplan, P.: Changes to the 2001 NCEP operational MRF/AVN global analysis/forecast system,  
*Tech. Procedures Bull.*, 484, Office of Meteorology, National Weather Service, 14, 2001.
- Nair, U. S., Weger, R. C., Kuo, K. S., and Welch, R. M.: Clustering, randomness, and regularity in cloud fields: 5. The nature  
of regular cumulus cloud fields, *J. Geophys. Res.*, 103, 11363–11380, 1998.
- 535 Nagle, F. W., and Holz, R. E.: Computationally efficient methods of collocating satellite, aircraft, and ground observations, *J.  
Atmos. Oceanic Technol.*, 26, 1585–1595, 2009.

- Negri, A. J., and Adler, R. F.: Relation of satellite-based thunderstorm intensity to radar-estimated rainfall, *J. Appl. Meteorol.*, 20, 288–300, 1981.
- Parol, F., Buriez, J. C., Brogniez, G., and Fouquart, Y.: Information content of AVHRR channels 4 and 5 with respect to the effective radius of cirrus cloud particles, *J. Appl. Meteorol.*, 30, 973–984, 1991.
- 540
- Pavolonis, M. J., and Heidinger, A. K.: Daytime cloud overlap detection from AVHRR and VIIRS, *J. Appl. Meteorol.*, 43, 762–778, 2004.
- Pavolonis, M. J., Heidinger, A. K., and Uttal, T.: Daytime global cloud typing from AVHRR and VIIRS: Algorithm description, validation, and comparisons, *J. Appl. Meteorol.*, 44, 804–826, 2005.
- 545
- Prata, A. J.: Observations of volcanic ash clouds in the 10–12  $\mu\text{m}$  window using AVHRR/2 data, *Int. J. Remote Sens.*, 10, 751–761, <https://doi.org/10.1080/01431168908903916>, 1989.
- Rossow, W. B. and Schiffer, R. A.: Advances in understanding clouds from ISCCP., *B. Am. Meteorol. Soc.*, 80, 2261–2287, 1999.
- Rossow, W., Mosher, F., Kinsella, E., Arking, A., Desbois, M., Harrison, E., Minnis, P., Ruprecht, E., Seze, G., Simmer, C., and Smith, E.: ISCCP cloud algorithm intercomparison, *J. Clim. Appl. Meteorol.*, 24, 877–903, 1985.
- 550
- Slingo, A., and Slingo, J. M.: The response of a general circulation model to cloud longwave forcing. I: Introduction and initial experiments. *Quart. J. Roy. Meteor. Soc.*, 114, 1027–1062, 1988.
- Strabala, K. I., Ackerman, S. A., and Menzel, W. P.: Cloud properties inferred from 8–12- $\mu\text{m}$  data, *J. Appl. Meteorol.*, 33, 212–229, 1994.
- 555
- Vaughan, M., Garnier, A., Josset, D., Avery, M., Lee, K.-P., Liu, Z., Hunt, W., Pelon, J., Hu, Y., Burton, S., Hair, J., Tackett, J. L., Getzewich, B., Kar, J., and Rodier, S.: CALIPSO lidar calibration at 1064 nm: version 4 algorithm, *Atmos. Meas. Tech.*, 12, 51–82, <https://doi.org/10.5194/amt-12-51-2019>, 2019.
- Wang, C., Luo, Z. J., Chen, X., Zeng, X., Tao, W.-K., and Huang, X.: A Physically Based Algorithm for Non-Blackbody Correction of Cloud-Top Temperature and Application to Convection Study., *J. Appl. Meteorol.*, 53, 1844–1856, 2014.
- 560
- Winker, D. M., Hunt, W. H., and McGill, M. J.: Initial performance assessment of CALIOP, *Geophys. Res. Lett.*, 34, L19803, [doi:10.1029/2007GL030135](https://doi.org/10.1029/2007GL030135), 2007.
- Winker, D. M., Vaughan, M. A., Omar, A. H., Hu, Y., Powell, K. A., Liu, Z., Hunt, W. H., and Young, S. A.: Overview of the CALIPSO mission and CALIOP data processing algorithms, *J. Atmos. Oceanic Technol.*, 26, 2310–2323, 2009.
- Young, S. A., Vaughan, M. A., Garnier, A., Tackett, J. L., Lambeth, J. D., and Powell, K. A.: Extinction and optical depth retrievals for CALIPSO's Version 4 data release, *Atmos. Meas. Tech.*, 11, 5701–5727, <https://doi.org/10.5194/amt-11-5701-2018>, 2018.
- 565
- Zhang, H., and Menzel, W. P.: Improvement in thin cirrus retrievals using an emissivity-adjusted CO<sub>2</sub> slicing algorithm, *J. Geophys. Res.*, 107, D17, 4327, 2002.

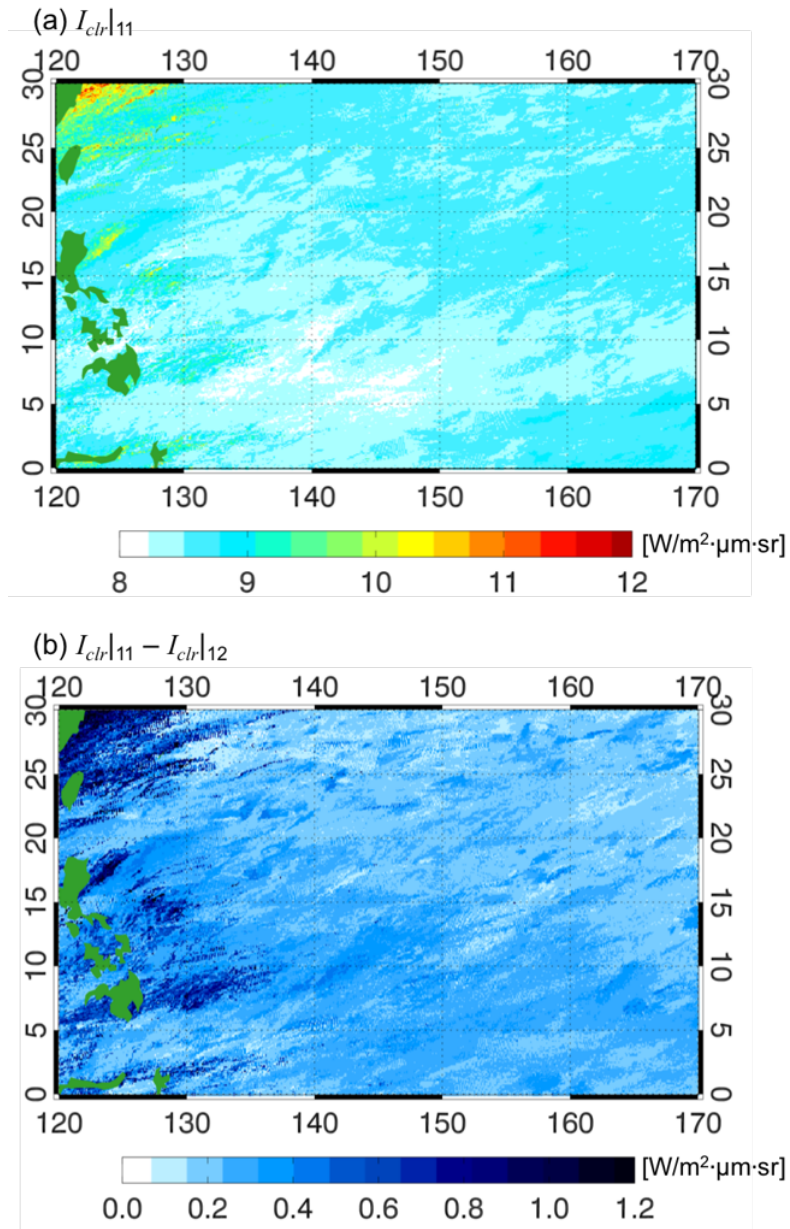

575 **Figure 1: The estimated clear sky radiance map at  $0.1^\circ \times 0.1^\circ$  resolution for (a)  $11 \mu\text{m}$  ( $I_{clr|11}$ ) in the unit of  $\text{W m}^{-2} \mu\text{m}^{-1} \text{sr}^{-1}$ . and (b)  $I_{clr|11} - I_{clr|12}$ .  $I_{clr|11}$  and  $I_{clr|12}$  are the maximum values among MODIS C6 radiances for three months of August (2013–2015) in each  $0.1^\circ \times 0.1^\circ$  grid box. Green-shaded contours over the map show land, which is generally from the Philippines.**

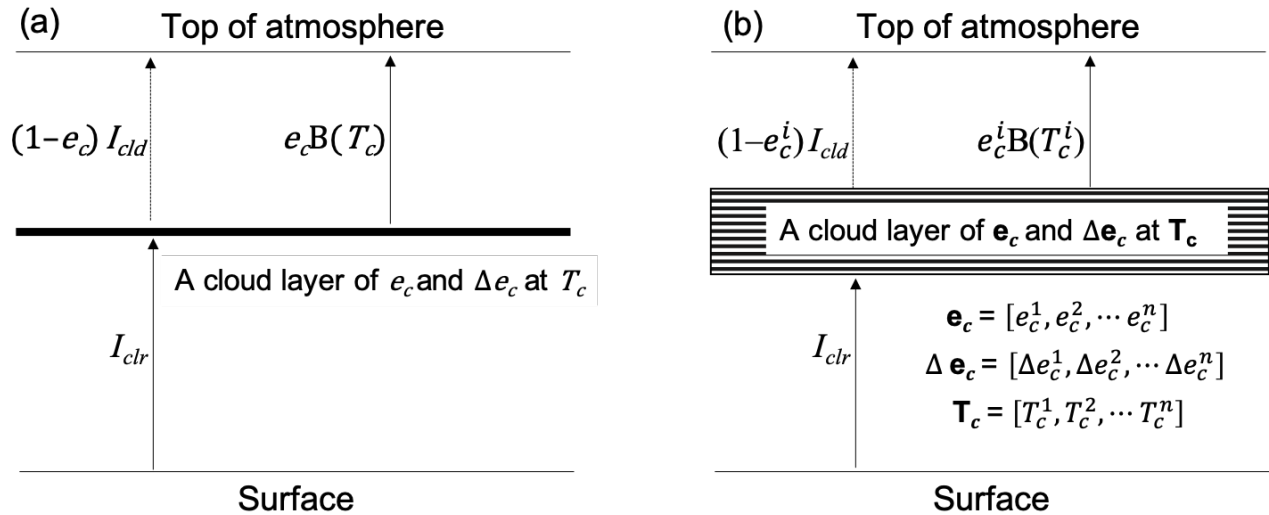

585 Figure 2: The conceptual model for (a) a plane parallel homogeneous cloud layer with no scattering, characterized by cloud emissivity ( $e_c$ ) and cloud emissivity differences between two infrared channels ( $\Delta e_c$ ) at the cloud temperature ( $T_c$ ) and (b) a number of plane parallel homogeneous cloud layers (the stripes box) with a possible range of  $e_c$  and  $\Delta e_c$  such as  $\mathbf{e}_c = [e_c^1, e_c^2, \dots, e_c^n]$  and  $\Delta \mathbf{e}_c = [\Delta e_c^1, \Delta e_c^2, \dots, \Delta e_c^n]$  corresponding to a possible range of cloud temperature,  $\mathbf{T}_c = [T_c^1, T_c^2, \dots, T_c^n]$ , where  $I_{clr}$  and  $B$  are the clear-sky radiance and the Planck's function, respectively. Arrows represent upwelling radiances.

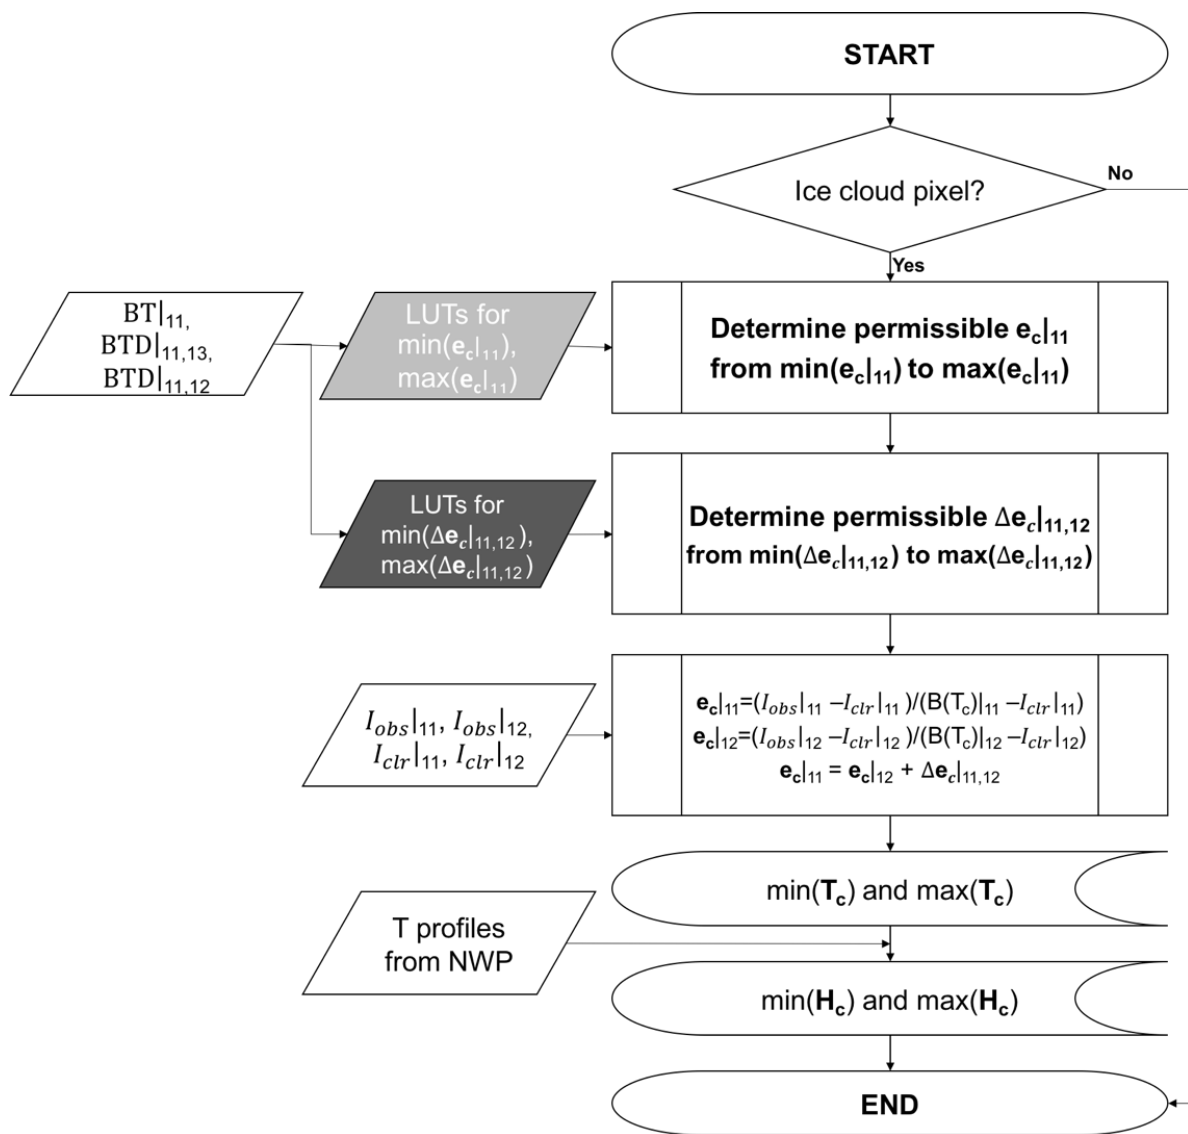

595

**Figure 3:** A flowchart for estimation of  $T_c$  and  $H_c$  corresponding to  $e_c$  (from a light gray box that will be shown in Fig. 3) and  $\Delta e_c$  (from a dark gray box that will be shown in Fig. 4) which represent cloud microphysics uncertainty in a certain cloud thickness. We denoted functions for minimum/maximum values of a matrix, A, as  $\min/\max(A)$ .

600

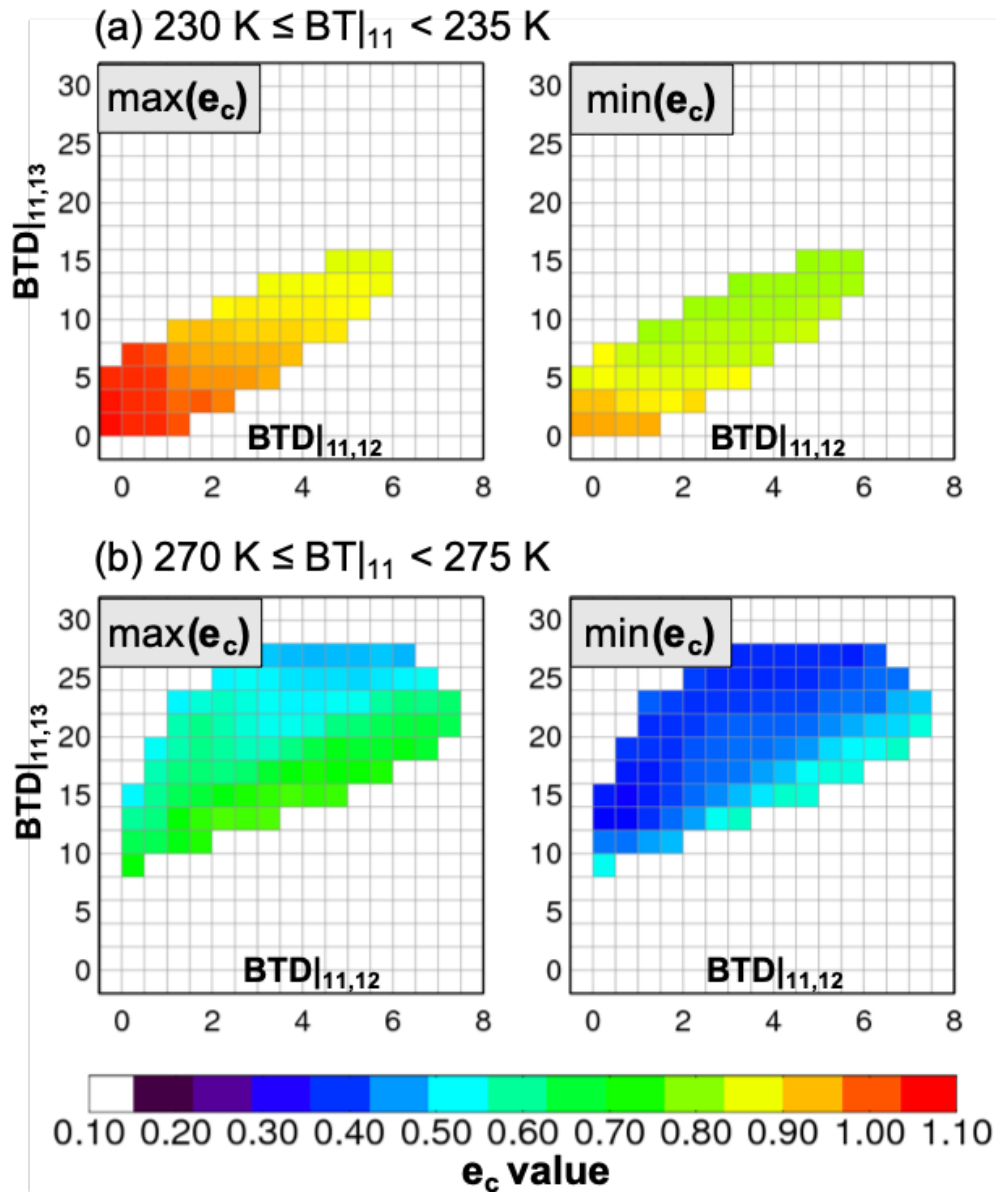

605 Figure 4: Look-up table values for min/max( $e_c$ ) (left/right panel in colors) by  $\text{BTD}|_{11,12}$  (x-axis) and  $\text{BTD}|_{11,13}$  (y-axis) for (a)  $230 \text{ K} \leq \text{BT}|_{11} < 235 \text{ K}$  and (b)  $270 \text{ K} \leq \text{BT}|_{11} < 275 \text{ K}$ . For this look-up table, ice cloud pixels with temperatures  $\leq 260 \text{ K}$  were collected from MODIS C6 over the western North Pacific Ocean during two months of Augusts (2013–2014). Table 1 summarizes data used in the look-up table. Also, Table 2 is for dimensions of the look-up table.

610

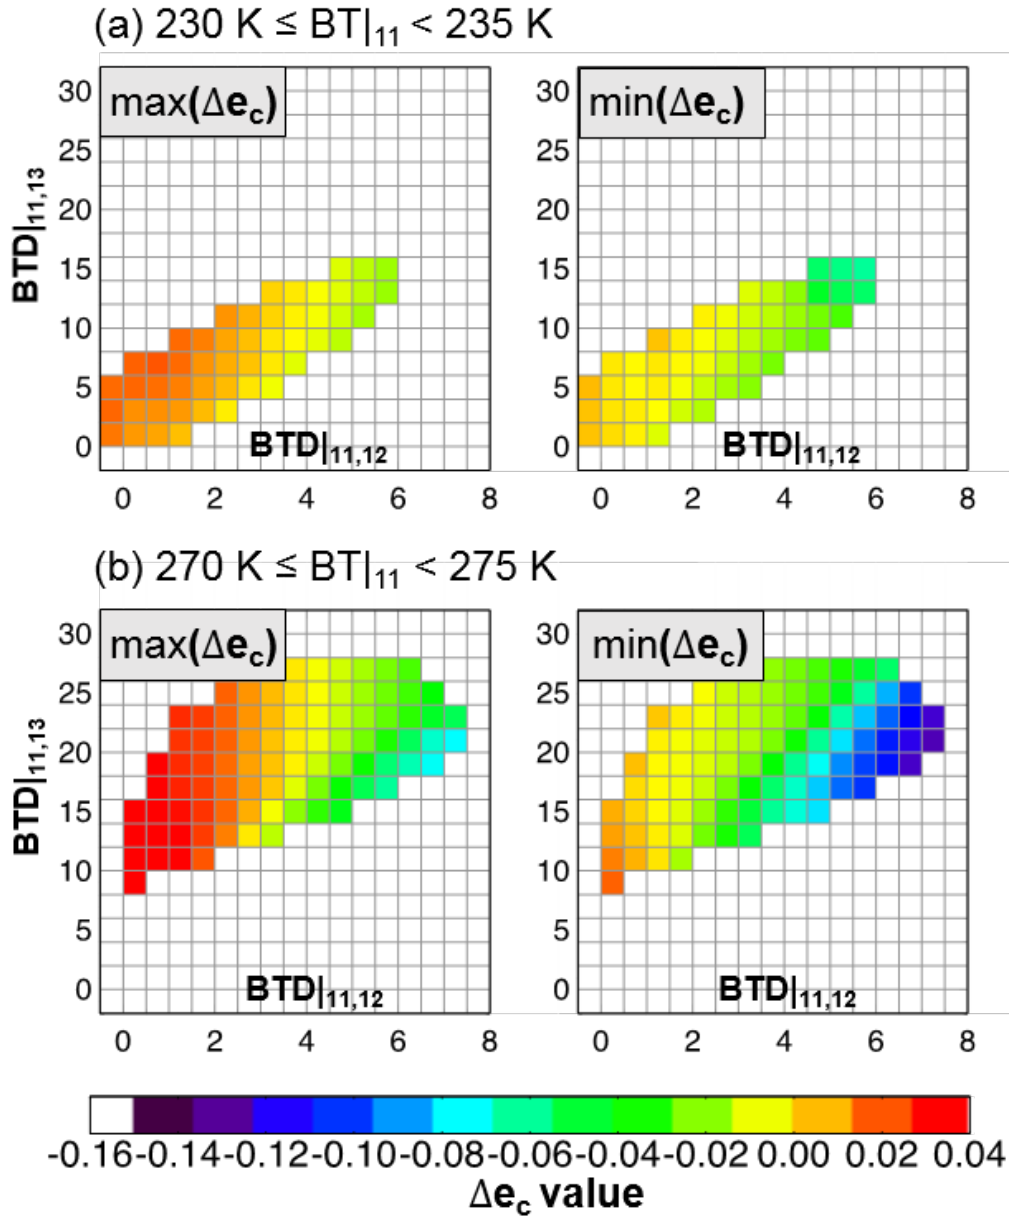

620 Figure 5: Look-up tables for min/max( $\Delta e_c$ ) (left/right panel in colors) by  $\text{BTD}|_{11,12}$  (x-axis) and  $\text{BTD}|_{11,13}$  (y-axis) for (a)  $230 \text{ K} \leq \text{BT}|_{11} < 235 \text{ K}$  and (b)  $270 \text{ K} \leq \text{BT}|_{11} < 275 \text{ K}$ . Identical data as in Fig. 4 are used to generate these look-up tables, except cloud emissivity differences between 11 and 12  $\mu\text{m}$  come from MODIS C6 (referring to Table 1 and Table 2).

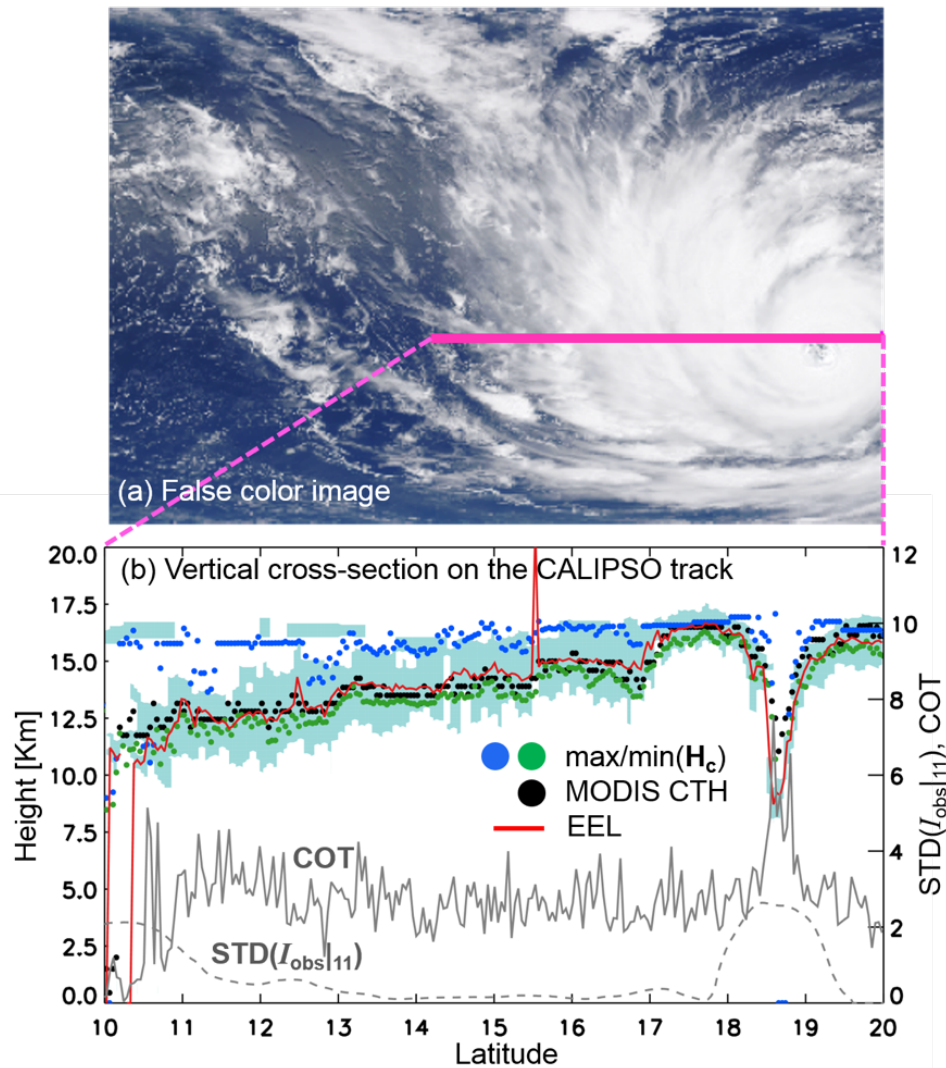

630 Figure 6: (a) MODIS false color image (rotated 90 degrees left) at 0320 UTC 19 August 2015. This scene captures part of Typhoon  
 635 Goni. The heavy pink line on the image shows CALIPSO track at the closest to MODIS observation time. (b) Vertical cross-section  
 of the CALIPSO track designated by the heavy pink line in Fig. 6(a). The vertical feature mask is shown as sky-blue and orange  
 contours (randomly and horizontally oriented ice, and water). The red solid line shows where the layer COT (integrated  $Q_e$  at 532  
 nm from CALIOP) reaches a value of 0.5. The green/blue and black circles are the min/max( $H_c$ ) and MODIS CTH, respectively.  
 The gray solid (dashed) line on right side y-axis is the column COT from CALIOP (standard deviation of 11- $\mu$ m radiances from  
 MODIS).



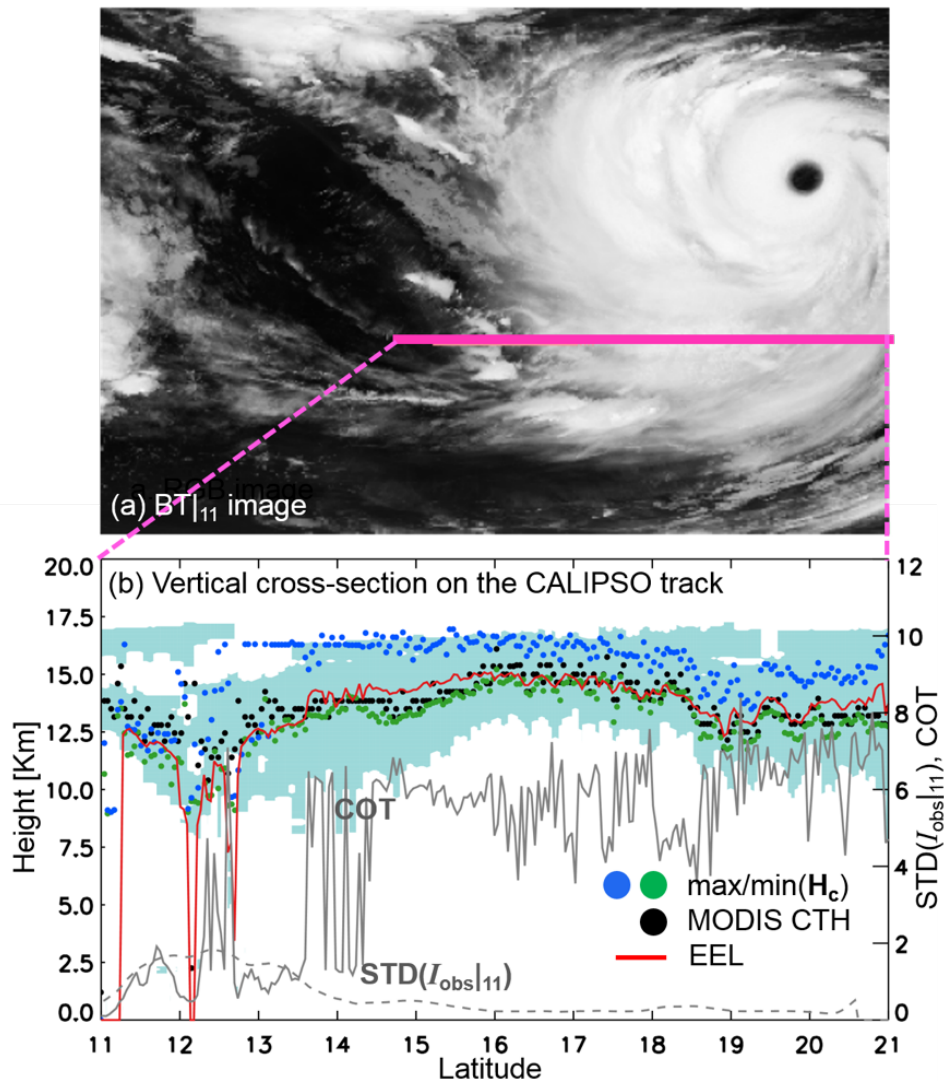

645 Figure 7: (a)  $BT|_{11}$  image from MODIS (MYD021 C6) at 1530 UTC on 19 August 2015. This scene captures part of Typhoon Goni. The heavy pink line on the  $BT|_{11}$  image shows CALIPSO track at the closest to MODIS observation time. (b) Vertical cross-section of the CALIPSO track designated by the heavy pink line in Fig. 7(a). The vertical feature mask is shown as sky-blue and orange contours (randomly and horizontally oriented ice, and water). The red solid line shows where the layer COT (integrated  $Q_e$  at 532 nm from CALIOP) reaches a value of 0.5. The green/blue and black circles are the min/max( $H_c$ ) and MODIS CTH, respectively. The gray solid (dashed) line on right side y-axis is the column COT from CALIOP (standard deviation of 11- $\mu$ m radiances from MODIS).  
650

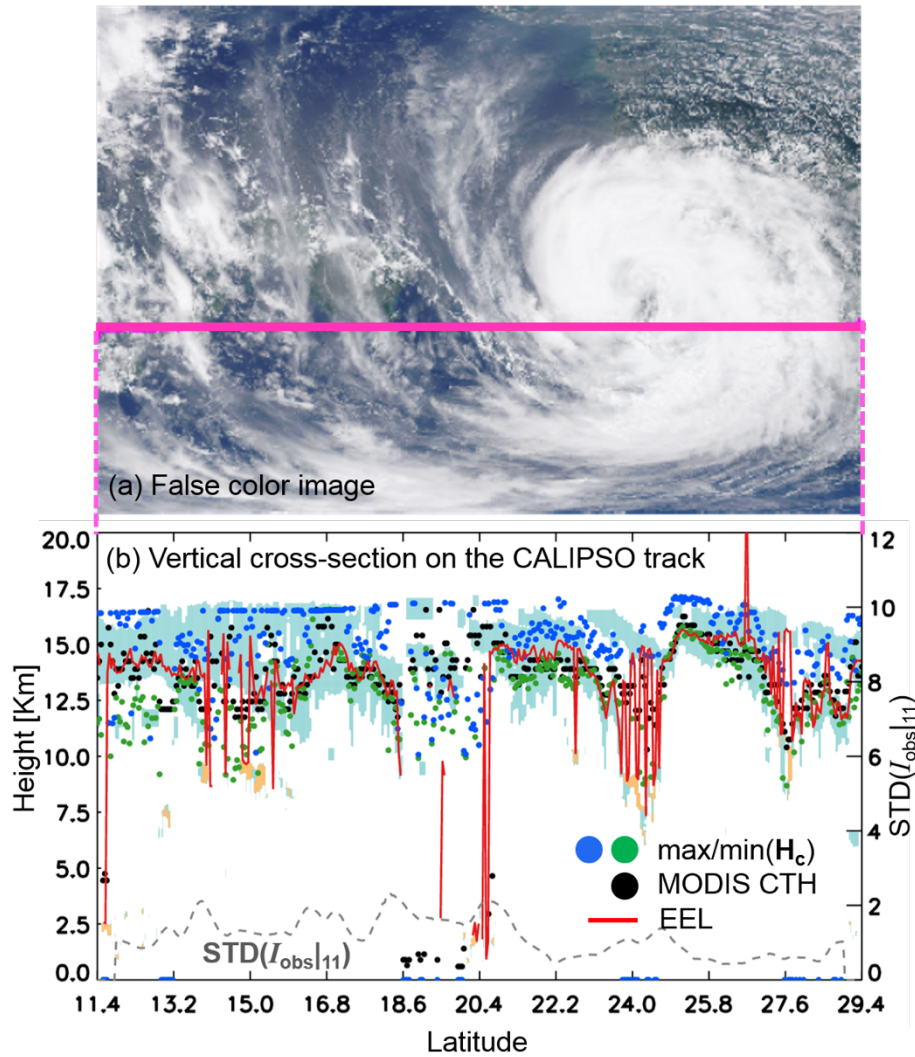

660 Figure 8: (a) MODIS false color image (rotated 90 degrees left) at 0520 UTC on 8 August 2015. This scene captures part of Typhoon  
 Goni. The heavy pink line on the image shows CALIPSO track at the closest to MODIS observation time. (b) Vertical cross-section  
 of the CALIPSO track designated by the heavy pink line in Fig. 8(a). The vertical feature mask is shown as sky-blue and orange  
 contours (randomly and horizontally oriented ice, and water). The red solid line shows where the layer COT (integrated  $Q_e$  at 532  
 nm from CALIOP) reaches a value of 0.5. The green/blue and black circles are the min/max( $H_c$ ) and MODIS CTH, respectively.  
 665 The gray solid (dashed) line on right side y-axis is the column COT from CALIOP (standard deviation of 11- $\mu$ m radiances from  
 MODIS).

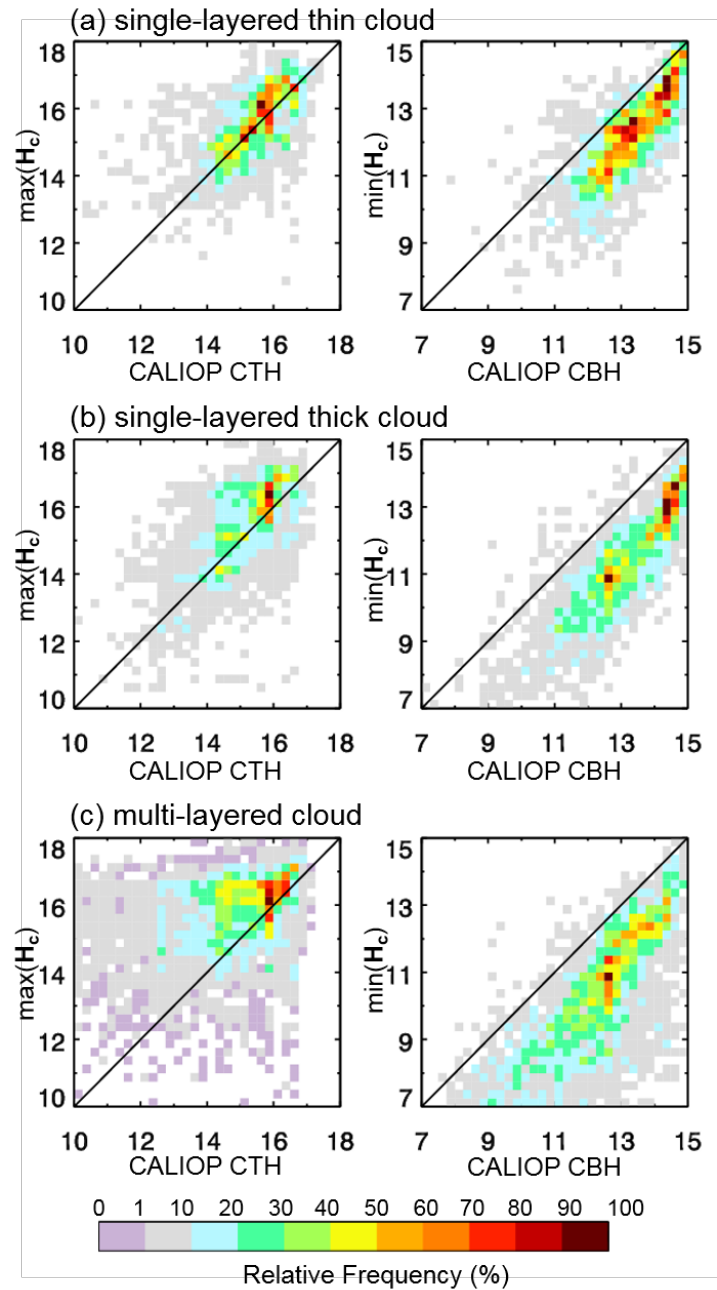

670 **Figure 9: Joint histograms of three cloud categories; (a) single-layered optically thin ice clouds, (b) optically thick ice clouds, and (c) multi-layered clouds during August 2015. The first column show CALIOP CTH (cloud top height, x-axis) versus  $\max(H_c)$  (y-axis), the second column shows CALIOP CBH (cloud base height, x-axis) versus  $\min(H_c)$  (y-axis).**

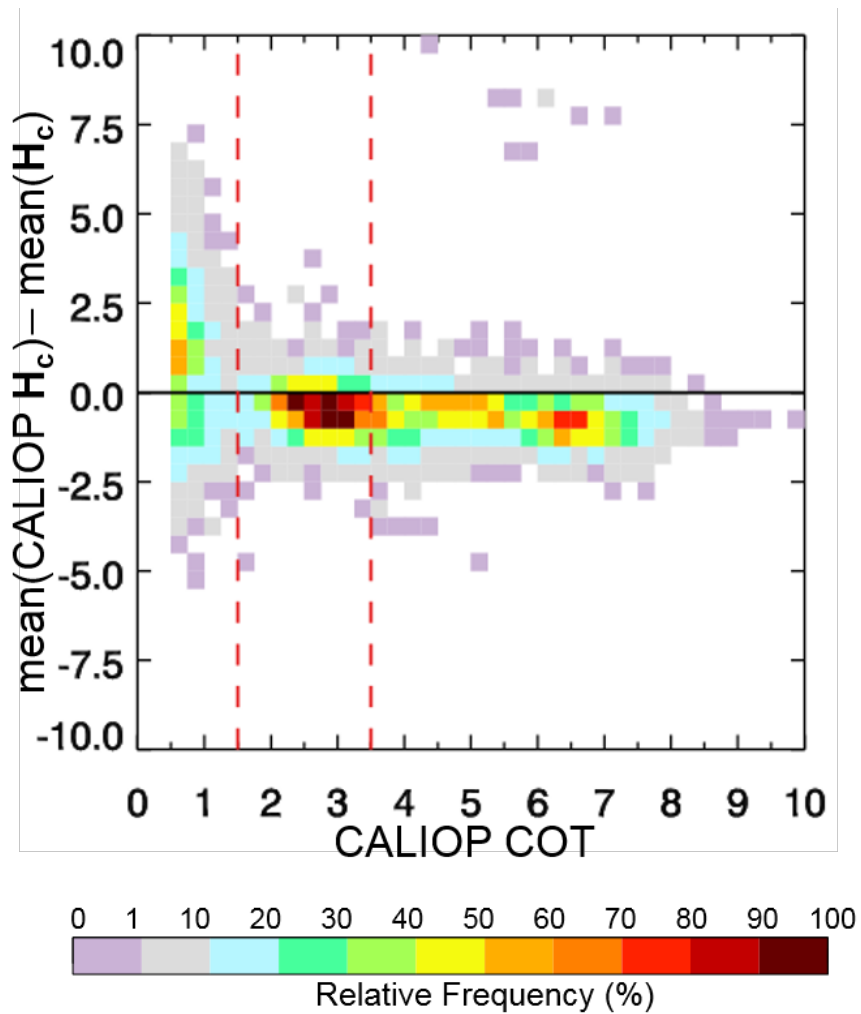

680

Figure 10: A frequency of biases of  $\text{mean}(H_c)$  from  $\text{mean}(\text{CALIOP } H_c)$  as a function of CALIOP COT during August 2015. The  $\text{mean}(\text{CALIOP } H_c)$  implies the average of upper and lower cloud boundary, simply defined as  $0.5 \cdot (\text{CALIOP CTH} + \text{CALIOP CBH})$ . The  $\text{mean}(H_c)$  is also the average of cloud heights by our method, defined as  $0.5 \cdot (\min(H_c) + \max(H_c))$ . The red dotted lines are references for single-layered optically thin ( $1.5 < \text{COT} \leq 3.5$ ) and optically thick ( $\text{COT} > 3.5$ ) ice clouds in this study.

685

690

|                | Variables                                                | MODIS C6 products             | Period              | Domain                                           |
|----------------|----------------------------------------------------------|-------------------------------|---------------------|--------------------------------------------------|
| Input data     | BT <sub>11</sub><br>BT <sub>12</sub><br>BT <sub>13</sub> | Band 31, 32, and 33 in MYD021 | August<br>2013/2014 | Western North Pacific<br>(0°N-30°N, 120°E-170°E) |
| Output data    | min/max( $e_c$ ) min/max( $\Delta e_c$ )                 | Cloud products in MYD06       |                     |                                                  |
| Auxiliary data | IR cloud thermodynamic phase                             |                               |                     |                                                  |

695 **Table 1: The detailed information used to generate empirical look-up tables (LUTs) of min/max( $e_c$ ) and min/max( $\Delta e_c$ ). MODIS bands 31, 32, and 33 have spectral wavelengths ranges of 10.78–11.28, 11.77–12.27, and 13.185–13.485  $\mu\text{m}$ , respectively.**

700

705

| Input parameters | Value ranges  | Increment             |
|------------------|---------------|-----------------------|
| $BT _{11}$       | 190 K – 290 K | 5 K                   |
| $BTD _{11,13}$   | -2 K – 30 K   | 2 K                   |
| $BTD _{11,12}$   | -1K –10 K     | 0.5 K <sup>7/15</sup> |

**Table 2: Parameter ranges and discretization of parameters in the LUTs for  $e_c$  (Fig. 3) and  $\Delta e_c$  (Fig. 4)**

720

|                                     | Variables                                                                       | Data/products used in Sec. 3     | Period                             | Domain                                        |
|-------------------------------------|---------------------------------------------------------------------------------|----------------------------------|------------------------------------|-----------------------------------------------|
| Input data                          | $I_{obs} _{11}$<br>$I_{obs} _{12}$<br>BT $ _{11}$<br>BT $ _{12}$<br>BT $ _{13}$ | Band 31, 32, and 33 in C6 MYD021 | August 2015                        | Western North Pacific (0°N-30°N, 120°E-170°E) |
|                                     | Auxiliary data                                                                  |                                  | $I_{clr} _{11}$<br>$I_{clr} _{12}$ |                                               |
| IR cloud thermodynamic phase        |                                                                                 | Cloud products in C6 MYD06       | August 2015                        |                                               |
| T/P profiles                        |                                                                                 | GFS NWP products                 | August 2015                        |                                               |
| References for scene analysis       | MODIS CTT/CTH                                                                   | Cloud products in C6 MYD06       | August 2015                        |                                               |
|                                     | VFM                                                                             | CAL_L1D_L2_VFM-Standard-V4       |                                    |                                               |
|                                     | CALIOP cloud phase                                                              |                                  |                                    |                                               |
|                                     | $Q_e$                                                                           | CAL_LID_L2_05kmCPro-Standard -V4 |                                    |                                               |
|                                     | T/P profiles                                                                    |                                  |                                    |                                               |
| COT                                 |                                                                                 |                                  |                                    |                                               |
| References for statistical analysis | Number of layer found                                                           | CAL_LID_L2_05kmCLay-Standard-V4  |                                    |                                               |
|                                     | CALIOP CTH/CBH                                                                  |                                  |                                    |                                               |
|                                     | CALIOP CTT/CBT                                                                  |                                  |                                    |                                               |

725

**Table 3: Data used for the tests shown in Fig. 2. Input and auxiliary data are taken from the MODIS C6 cloud products and from CALIOP V4 cloud products. The abbreviations, CTT/CBT, CTH/CBH, COT, T/P, and VFM refer to cloud top/base temperature, cloud top/base height, cloud optical thickness, temperature/pressure, and vertical feature mask. The vertical profile of the extinction coefficient at 532 nm is denoted as the  $Q_e$ .**

730

| Category                                       | Criteria                               | Count | CALIOP CTH vs. max( $H_c$ )<br>(CALIOP CTT vs. min( $T_c$ )) |                  |                 | CALIOP CBH vs. min( $H_c$ )<br>(CALIOP CBT vs. max( $T_c$ )) |                  |                 |
|------------------------------------------------|----------------------------------------|-------|--------------------------------------------------------------|------------------|-----------------|--------------------------------------------------------------|------------------|-----------------|
|                                                |                                        |       | Corr                                                         | Bias             | Rmsd            | Corr                                                         | Bias             | Rmsd            |
| All ice                                        |                                        | 11873 | 0.31<br>(0.29)                                               | 0.88<br>(-6.15)  | 2.07<br>(15.21) | 0.67<br>(0.70)                                               | -3.17<br>(22.40) | 4.54<br>(30.20) |
| Single-layered<br>optically thin ice<br>cloud  | NLF = 1<br>$1.5 < \text{COT} \leq 3.5$ | 2237  | 0.61<br>(0.57)                                               | 0.13<br>(-0.62)  | 0.91<br>(6.12)  | 0.83<br>(0.83)                                               | -1.01<br>(8.02)  | 1.31<br>(10.66) |
| Single-layered<br>optically thick ice<br>cloud | NLF = 1<br>$\text{COT} > 3.5$          | 3067  | 0.65<br>(0.66)                                               | 0.30<br>(-1.53)  | 1.08<br>(7.12)  | 0.87<br>(0.87)                                               | -1.71<br>(13.96) | 1.92<br>(15.53) |
| Multi-layered<br>cloud                         | NLF > 1                                | 6569  | 0.25<br>(0.23)                                               | 1.41<br>(-10.18) | 2.64<br>(19.53) | 0.48<br>(0.48)                                               | -4.64<br>(31.22) | 5.95<br>(38.69) |

735 **Table 4. Comparison of max( $H_c$ ) (min( $H_c$ )) to the CALIOP CTH (CALIOP CBH) for all cloud pixels and three cloud regimes; single-layered optically thin ice clouds, optically thick ice clouds and multi-layered clouds for August, 2015. Pixel numbers (count), correlation coefficients (corr) and differences of the mean values (bias), root mean square differences (rmsd) are provided. Additionally, comparison of min/max( $T_c$ ) to the CALIOP CTT/CBT are also shown as numbers of round brackets.**

740
